# Supplementary material for: Aluminum-catalyzed statistical copolymerization of mono-, tri- and penta-fluorophenyl glycidyl ether with ethylene oxide and epichlorohydrin
Source: Royal Society of Chemistry journal article supplement (doi:10.1039/d1py00938a), 2021-01-01
Supplement: d1py00938a1.pdf [file d1py00938a1.pdf]

## Electronic Supplementary Information

### **Aluminum-catalyzed statistical copolymerization of mono-, tri- and penta-fluorophenyl glycidyl ether with ethylene oxide and epichlorohydrin**

*Fang Guo, Ming Deng, Fan Li, and Shoulong Chen*

*State Key Laboratory of Fine Chemicals, Department of Polymer Science and Engineering, School of Chemical*

*Engineering, Dalian University of Technology, Dalian 116012, China*

## Content

|                                                                                                                                                         |    |
|---------------------------------------------------------------------------------------------------------------------------------------------------------|----|
| Fig. S1. <sup>1</sup> H-NMR spectrum of a MFPGE homopolymer.....                                                                                        | 3  |
| Fig. S2. 135DEPT- <sup>13</sup> C-NMR spectrum of a MFPGE homopolymer.....                                                                              | 3  |
| Fig. S3. <sup>1</sup> H-NMR spectra of MFPGE-EO statistical copolymers with different MFPGE content.....                                                | 4  |
| Fig. S4. 135DEPT- <sup>13</sup> C-NMR spectrum of a MFPGE-EO statistical copolymer with 54 mol% MFPGE.                                                  | 4  |
| Fig. S5. <sup>1</sup> H-NMR spectra of MFPGE-ECH statistical copolymers with different MFPGE content.....                                               | 5  |
| Fig. S6. <sup>13</sup> C-NMR spectrum of a MFPGE-ECH statistical copolymer with 50 mol% MFPGE.....                                                      | 5  |
| Fig. S7. <sup>1</sup> H-NMR spectrum of a TFPGE homopolymer.....                                                                                        | 6  |
| Fig. S8. <sup>1</sup> H-NMR spectra of TFPGE-EO statistical copolymers with different TFPGE content.....                                                | 6  |
| Fig. S9. 135DEPT- <sup>13</sup> C-NMR spectrum of a TFPGE-EO statistical copolymer with 50 mol% TFPGE....                                               | 7  |
| Fig. S10. <sup>1</sup> H-NMR spectra of TFPGE-ECH statistical copolymers with different TFPGE content.....                                              | 7  |
| Fig. S11. <sup>13</sup> C-NMR spectrum of a TFPGE-ECH statistical copolymer with 50 mol% TFPGE.....                                                     | 8  |
| Fig. S12. <sup>1</sup> H-NMR spectrum of a PFPGE homopolymer.....                                                                                       | 8  |
| Fig. S13. <sup>1</sup> H-NMR spectra of PFPGE-EO statistical copolymers with different PFPGE content.....                                               | 9  |
| Fig. S14. 135DEPT- <sup>13</sup> C-NMR spectrum of a PFPGE-EO statistical copolymer with 50 mol% PFPGE..                                                | 9  |
| Fig. S15. <sup>1</sup> H-NMR spectra of PFPGE-ECH statistical copolymers with different PFPGE content.....                                              | 10 |
| Fig. S16. <sup>13</sup> C-NMR spectrum of a PFPGE-ECH statistical copolymer with 50 mol% PFPGE.....                                                     | 10 |
| Fig. S17. <sup>1</sup> H-NMR spectra of kinetic experiment of MFPGE/EO copolymerization.....                                                            | 11 |
| Fig. S18. <sup>1</sup> H-NMR spectra of kinetic experiment of MFPGE/ECH copolymerization.....                                                           | 12 |
| Fig. S19. <sup>1</sup> H-NMR spectra of kinetic experiment of TFPGE/EO copolymerization.....                                                            | 13 |
| Fig. S20. <sup>1</sup> H-NMR spectra of kinetic experiment of TFPGE/ECH copolymerization.....                                                           | 14 |
| Fig. S21. <sup>1</sup> H-NMR spectra of kinetic experiment of PFPGE/EO copolymerization.....                                                            | 15 |
| Fig. S22. <sup>1</sup> H-NMR spectra of kinetic experiment of PFPGE/ECH copolymerization.....                                                           | 16 |
| Fig. S23. <sup>1</sup> H-NMR spectrum of a MFPGE-EO block copolymer with 20 mol% MFPGE.....                                                             | 17 |
| Fig. S24. <sup>1</sup> H-NMR spectrum of a EO-PFPGE-EO block copolymer with 12 mol% MFPGE.....                                                          | 17 |
| Fig. S25. <sup>13</sup> C-NMR spectrum of a EO-MFPGE-EO block terpolymer with 11 mol% MFPGE.....                                                        | 18 |
| Fig. S26. <sup>13</sup> C-NMR spectrum of a EO-TFPGE-EO block terpolymer with 11 mol% TFPGE.....                                                        | 18 |
| Fig. S27. <sup>13</sup> C-NMR spectrum of a EO-PFPGE-EO block terpolymer with 11 mol% PFPGE.....                                                        | 19 |
| Fig. S28. DSC curves of MFPGE-EO statistical copolymers with different compositions.....                                                                | 19 |
| Fig. S29. DSC curves of TFPGE-EO statistical copolymers with different compositions.....                                                                | 20 |
| Fig. S30. DSC curves of PFPGE-EO statistical copolymers with different compositions.....                                                                | 20 |
| Fig. S31. DSC curves of MFPGE-ECH statistical copolymers with different compositions.....                                                               | 21 |
| Fig. S32. DSC curves of TFPGE-ECH statistical copolymers with different compositions.....                                                               | 21 |
| Fig. S33. DSC curves of PFPGE-ECH statistical copolymers with different compositions.....                                                               | 22 |
| Fig. S34. DSC curves of MFPGE-EO, TFPGE-EO, and PFPGE-EO block copolymers.....                                                                          | 22 |
| Fig. S35. GPC traces of MFPGE-EO, TFPGE-EO, TFPGE-EO statistical copolymers.....                                                                        | 23 |
| Fig. S36. GPC traces of MFPGE-ECH, TFPGE-ECH, TFPGE-ECH statistical copolymers.....                                                                     | 23 |
| Fig. S37. <sup>1</sup> H-NMR spectra of kinetic experiment of PGE/EO copolymerization.....                                                              | 24 |
| Fig. S38. Comparisons of <sup>13</sup> C-NMR spectra of PFPGE-EO, TFPGE-EO, MFPGE-EO and PGE-EO copolymers with 50 mol% EO.....                         | 25 |
| Fig. S39. <sup>13</sup> C-NMR spectra of PGE homopolymer and PGE-EO copolymer with 50 mol% MFPGE..                                                      | 25 |
| Fig. S40. DSC curves of PGE homopolymer and PGE-EO copolymer with 50 mol% MFPGE.....                                                                    | 26 |
| Table S1. Simultaneous copolymerization of phenyl glycidyl ether (PGE) with EO by <i>i</i> -Bu <sub>3</sub> Al/H <sub>3</sub> PO <sub>4</sub> /DBU..... | 26 |

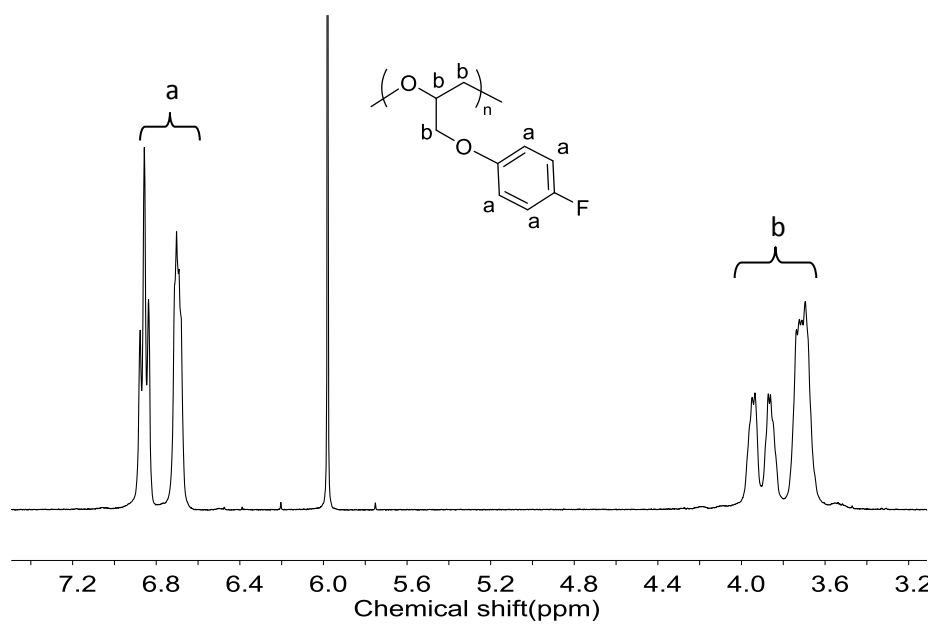

**Fig. S1.**  $^1\text{H-NMR}$  spectrum of a MFPGE homopolymer (Table 1, Run 1)

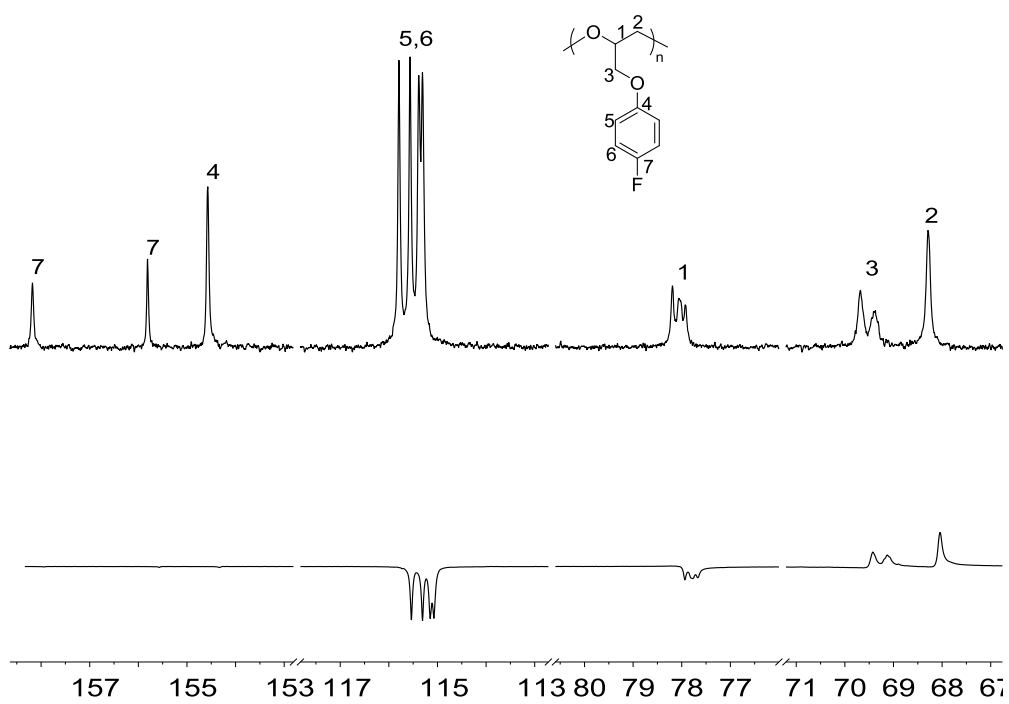

**Fig. S2.**  $^{135}\text{DEPT-}^{13}\text{C-NMR}$  spectrum of a MFPGE homopolymer (Table 1, Run 1)

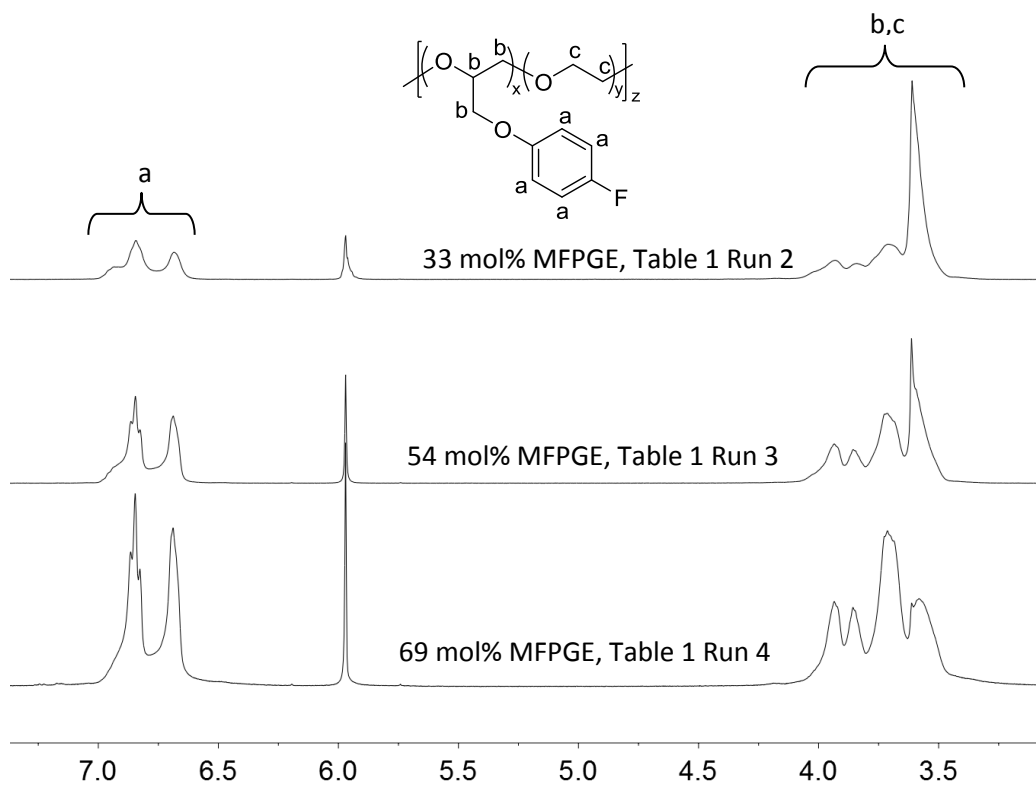

**Fig. S3.**  $^1\text{H-NMR}$  spectra of MFPGE-EO statistical copolymers with different MFPGE content

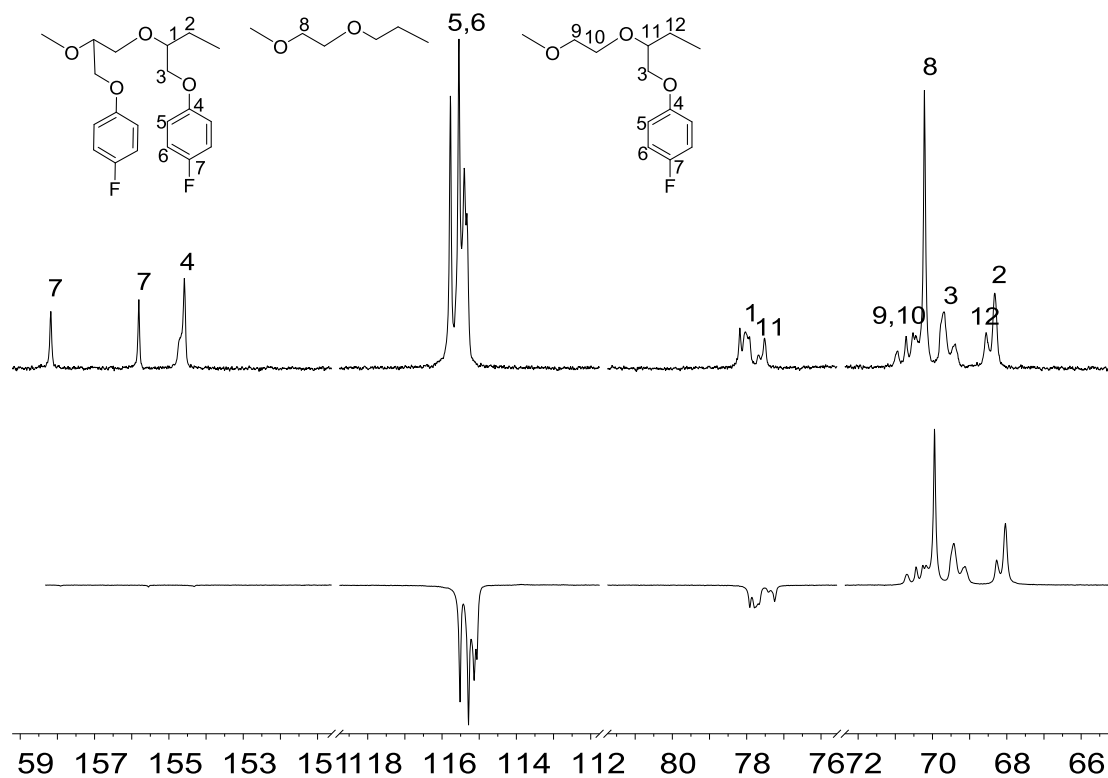

**Fig. S4.**  $^{135}\text{DEPT-}^{13}\text{C-NMR}$  spectrum of a MFPGE-EO statistical copolymer with 54 mol% MFPGE (Table 1, Run 3)

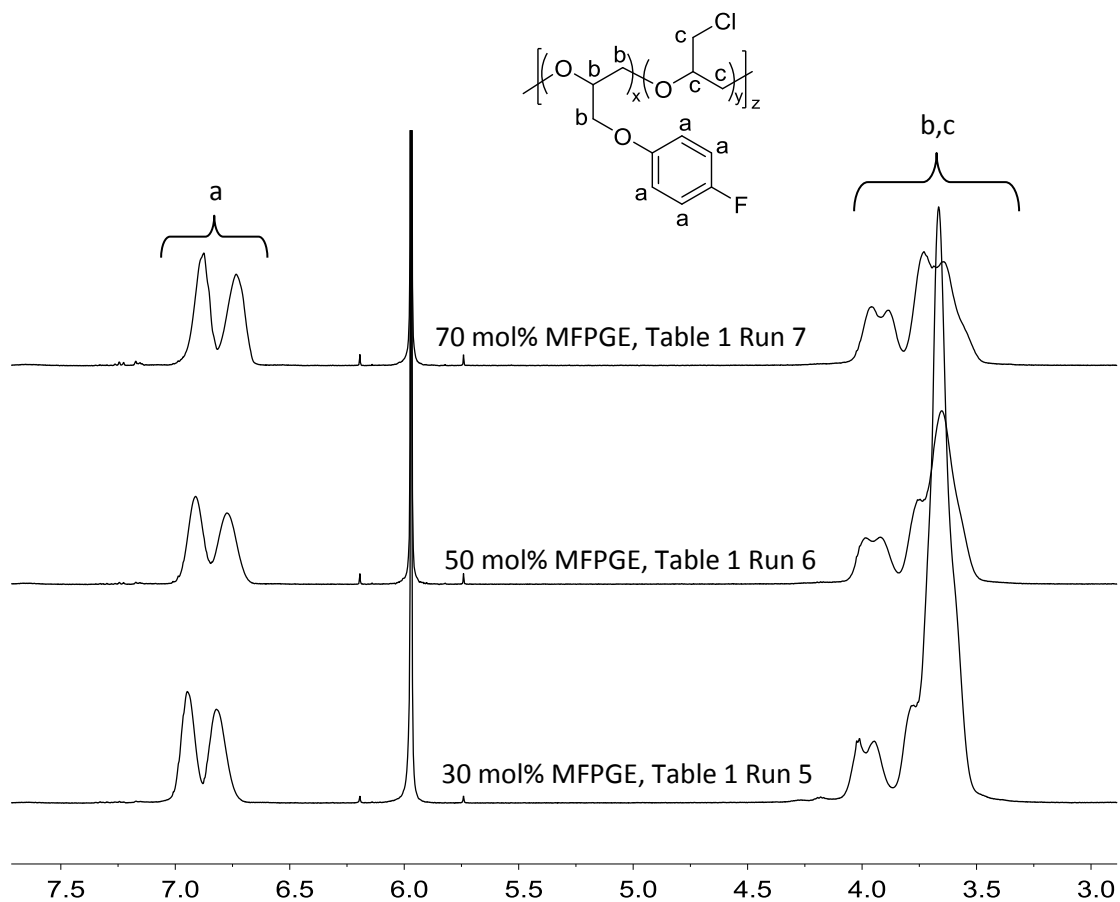

Fig. S5.  $^1\text{H}$ -NMR spectra of MFPGE-ECH statistical copolymers with different MFPGE content

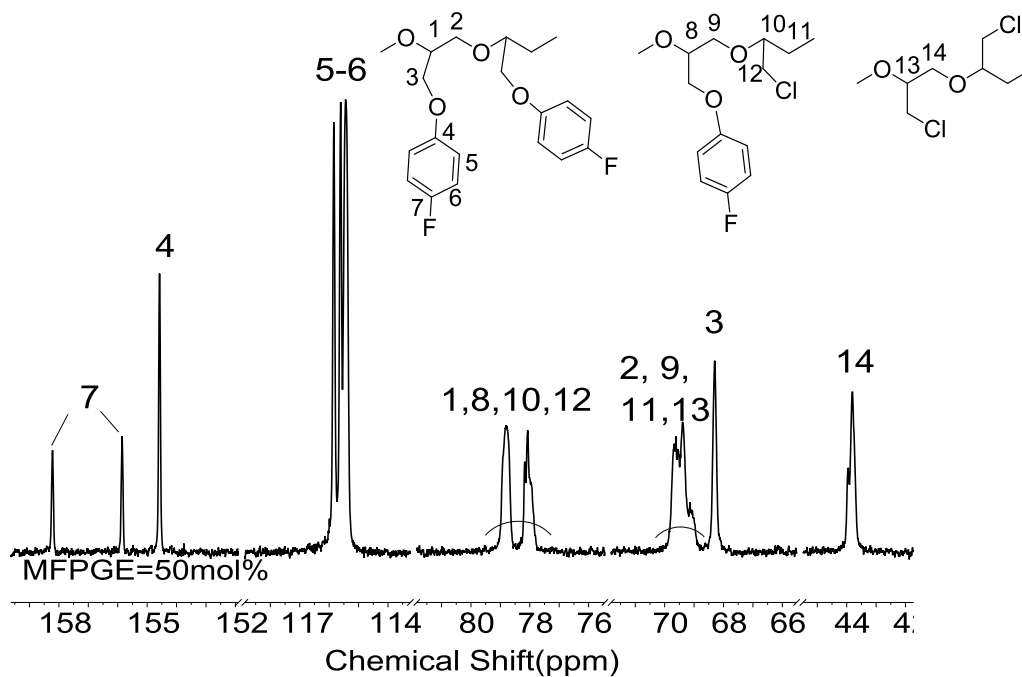

Fig. S6.  $^{13}\text{C}$ -NMR spectrum of a MFPGE-ECH statistical copolymer with 50 mol% MFPGE (Table 1, Run 6)

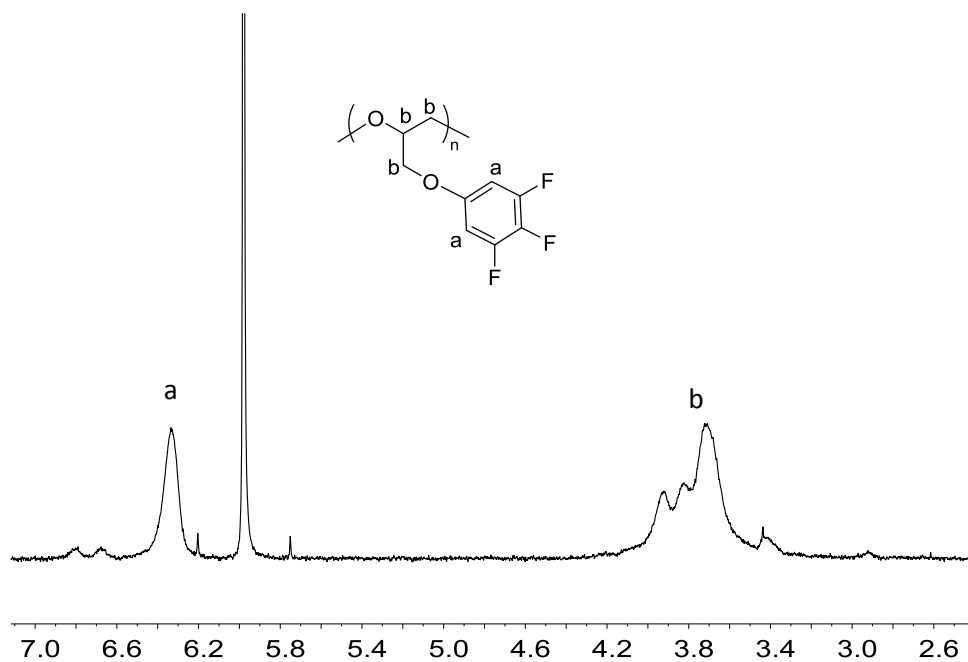

Fig. S7.  $^1\text{H-NMR}$  spectrum of a TFPGE homopolymer (Table 1, Run 8)

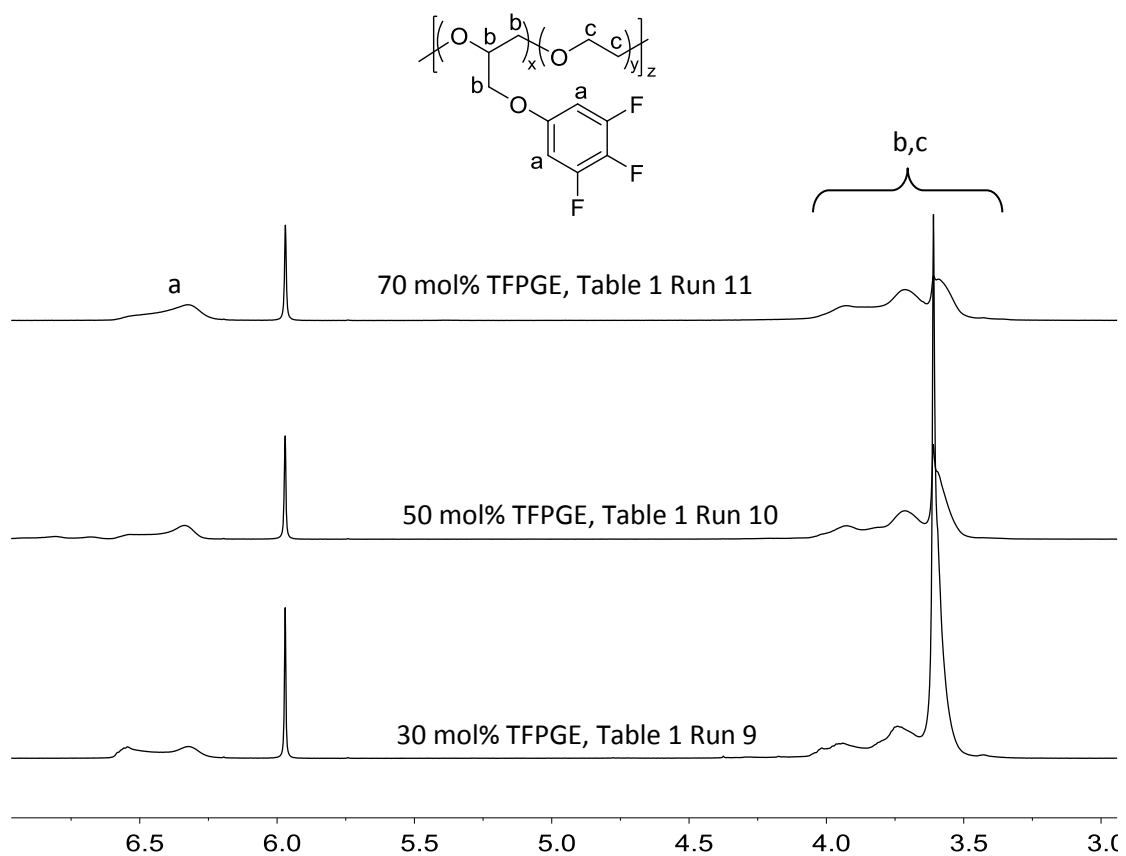

Fig. S8.  $^1\text{H-NMR}$  spectra of TFPGE-EO statistical copolymers with different TFPGE content

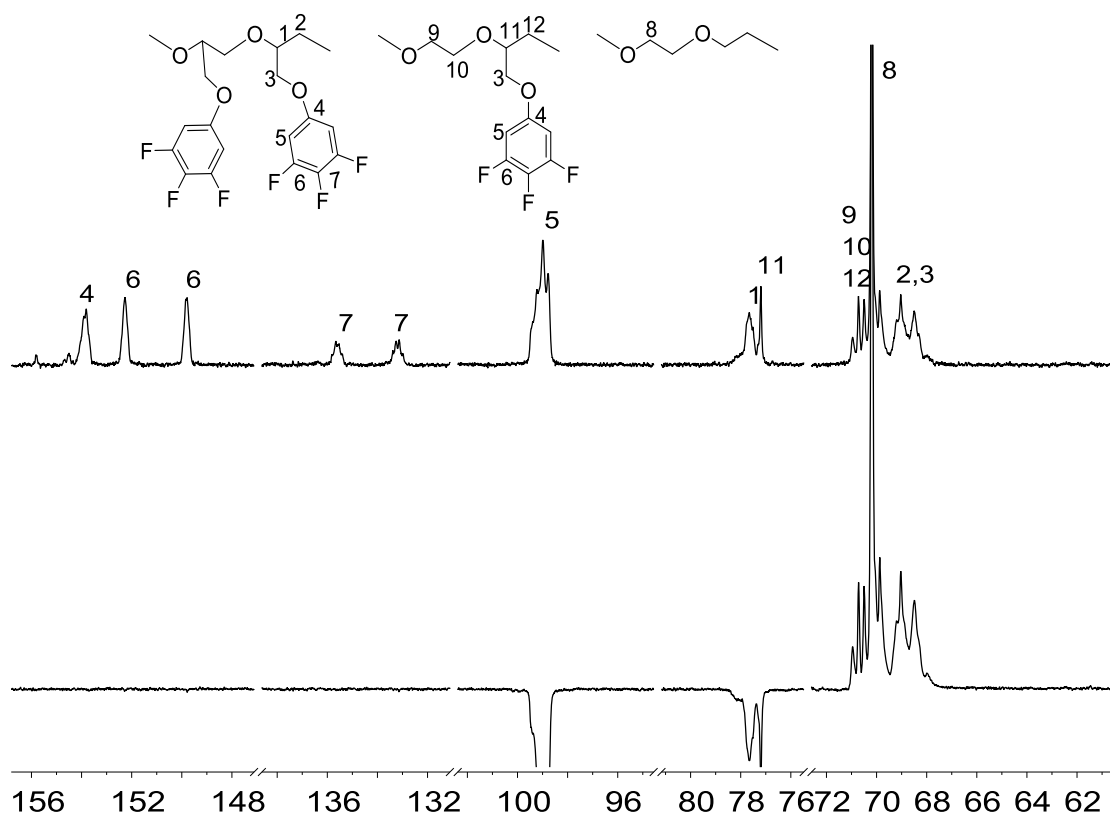

**Fig. S9.**  $^{135}\text{DEPT-}^{13}\text{C-NMR}$  spectrum of a TFPGE-EO statistical copolymer with 50 mol% TFPGE (Table 1, Run 10)

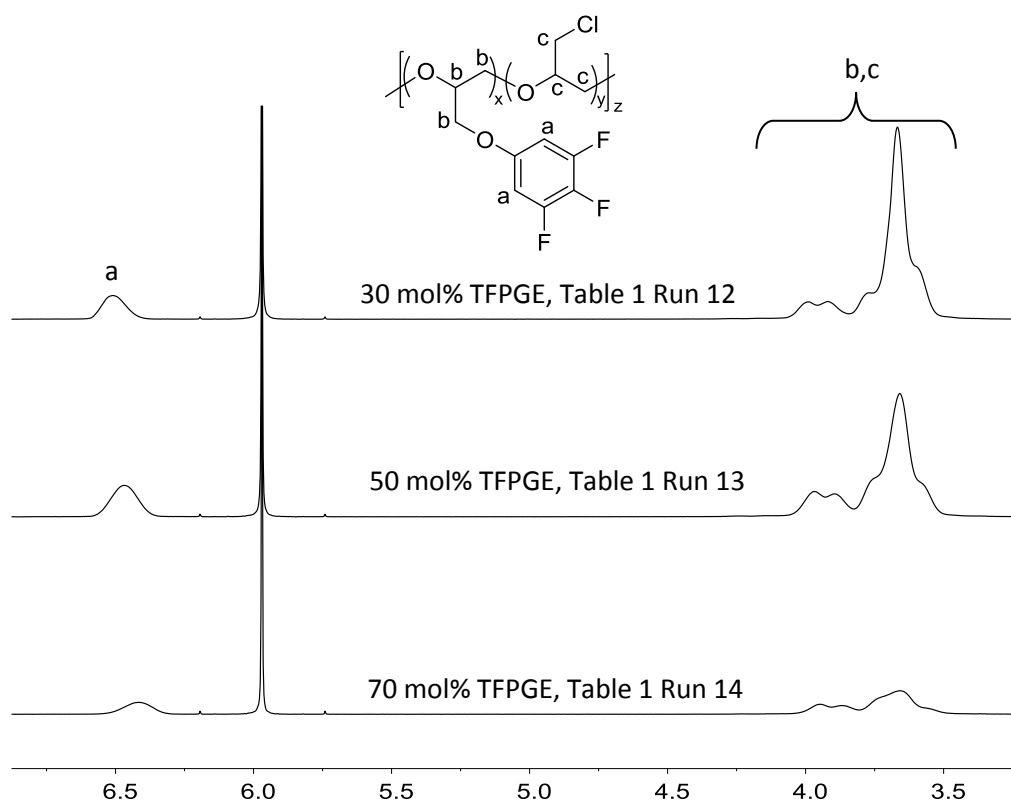

**Fig. S10.**  $^1\text{H-NMR}$  spectra of TFPGE-ECH statistical copolymers with different TFPGE content

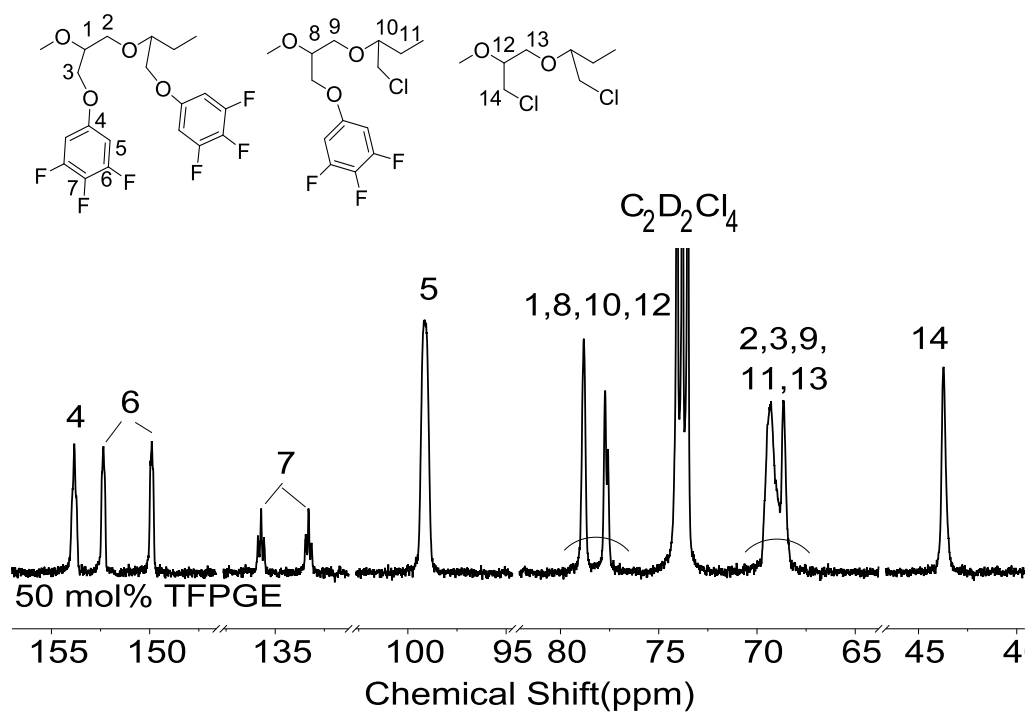

**Fig. S11.**  $^{13}\text{C}$ -NMR spectrum of a TFPGE-ECH statistical copolymer with 50 mol% TFPGE (Table 1, Run 13)

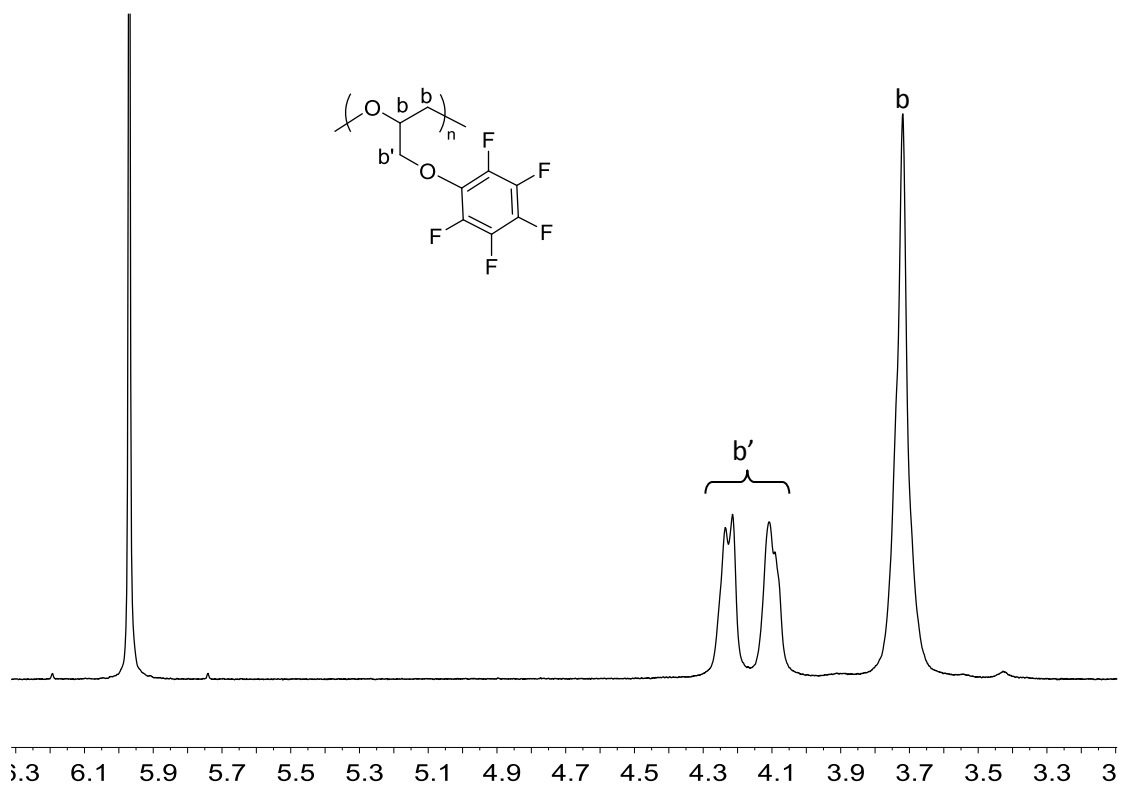

**Fig. S12.**  $^1\text{H}$ -NMR spectrum of a PFPGE homopolymer (Table 1, Run 15)



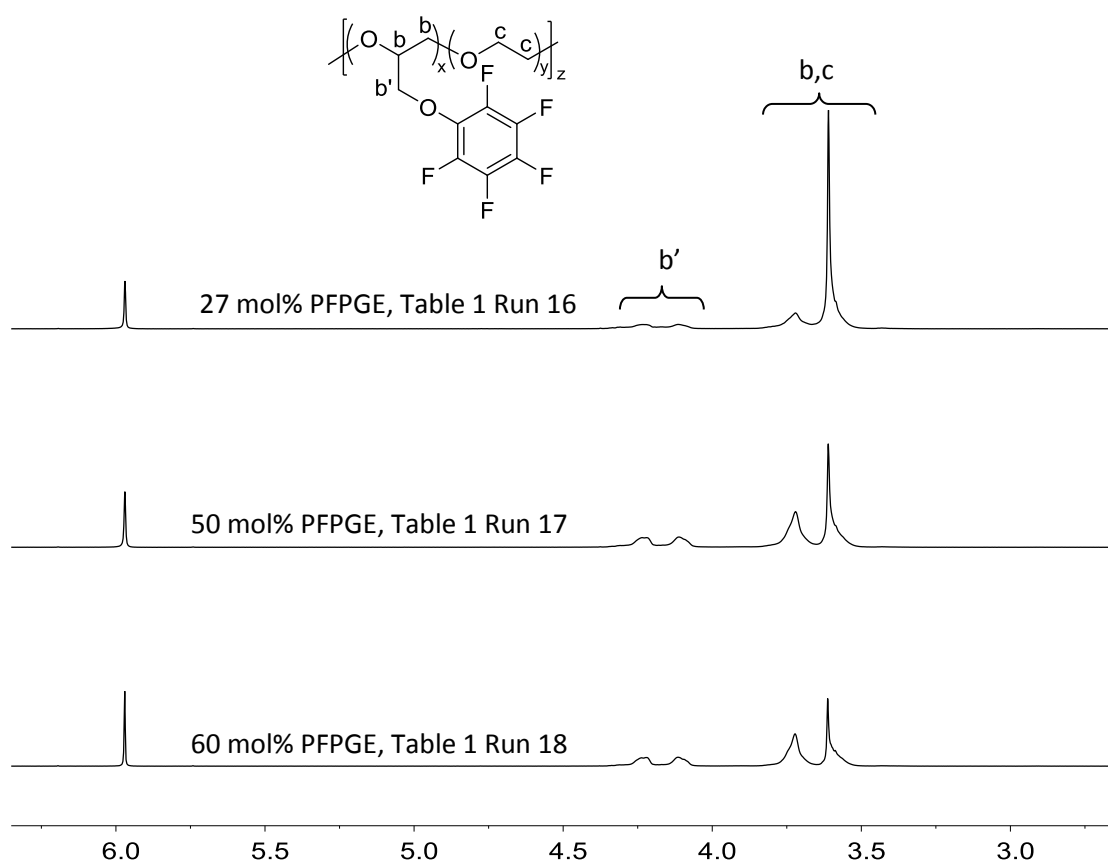

**Fig. S13.**  $^1\text{H-NMR}$  spectra of PFPGE-EO statistical copolymers with different PFPGE content

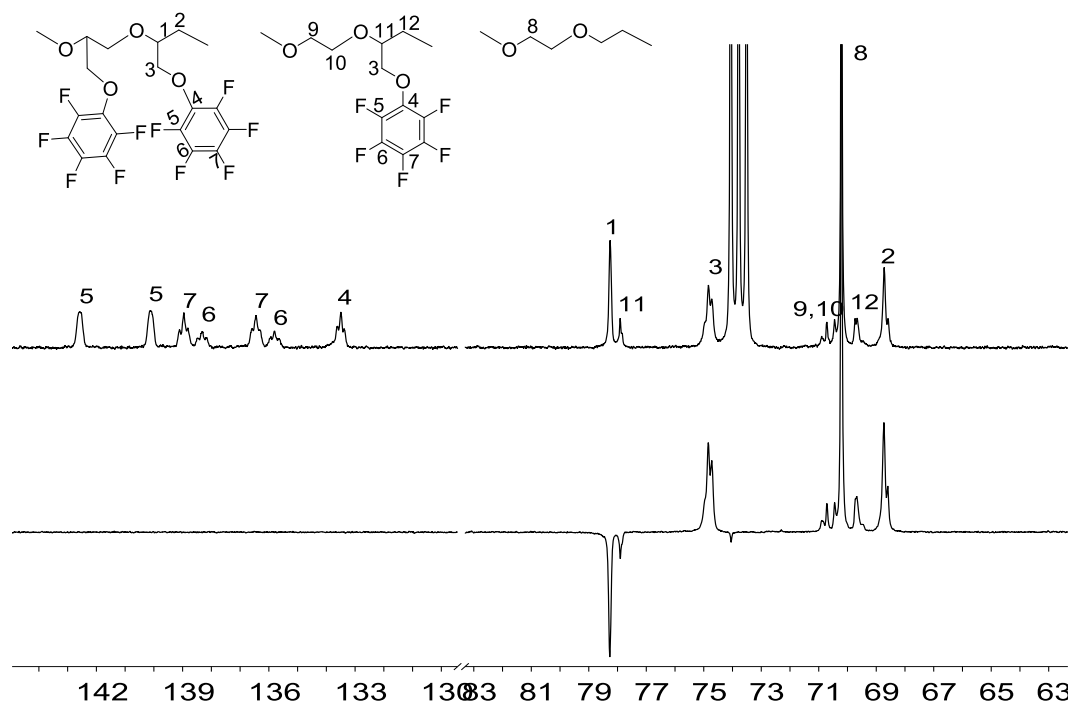

**Fig. S14.**  $^{135}\text{DEPT-}^{13}\text{C-NMR}$  spectrum of a PFPGE-EO statistical copolymer with 50 mol% PFPGE (Table 1, Run 17)

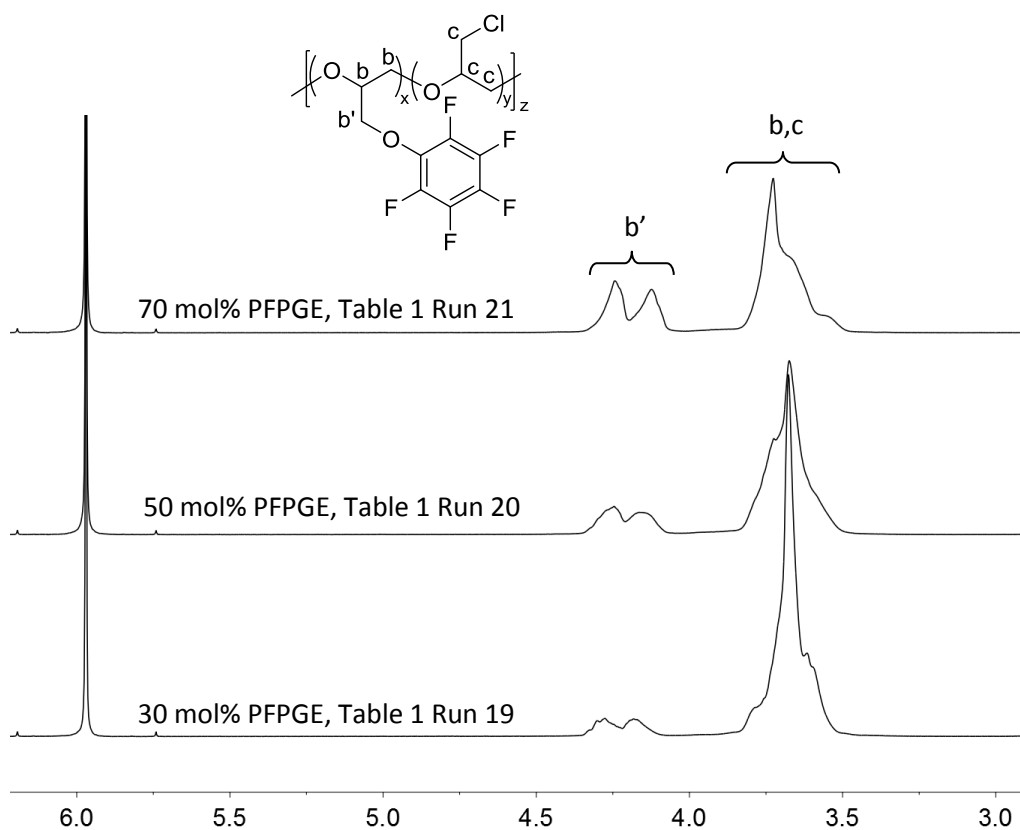

**Fig. S15.**  $^1\text{H}$ -NMR spectra of PFPGE-ECH statistical copolymers with different PFPGE content

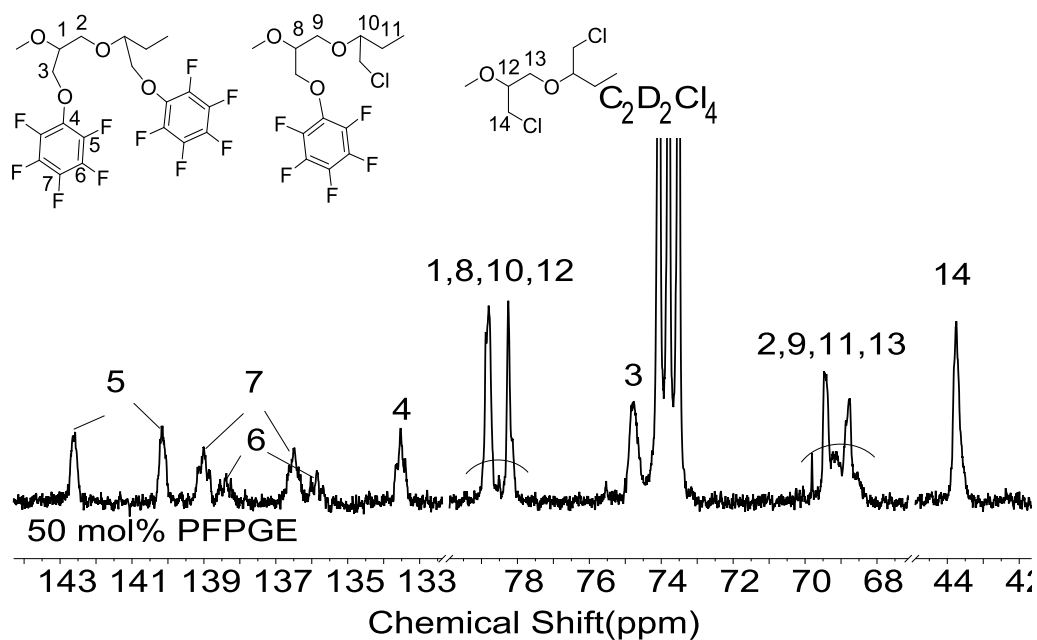

**Fig. S16.**  $^{13}\text{C}$ -NMR spectrum of a PFPGE-ECH statistical copolymer with 50 mol% PFPGE (Table 1, Run 20)

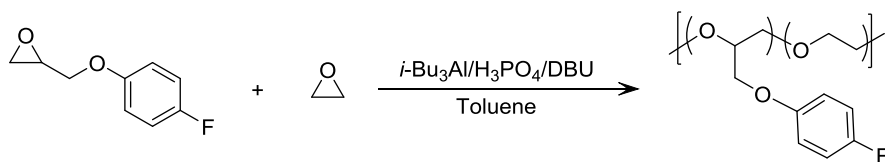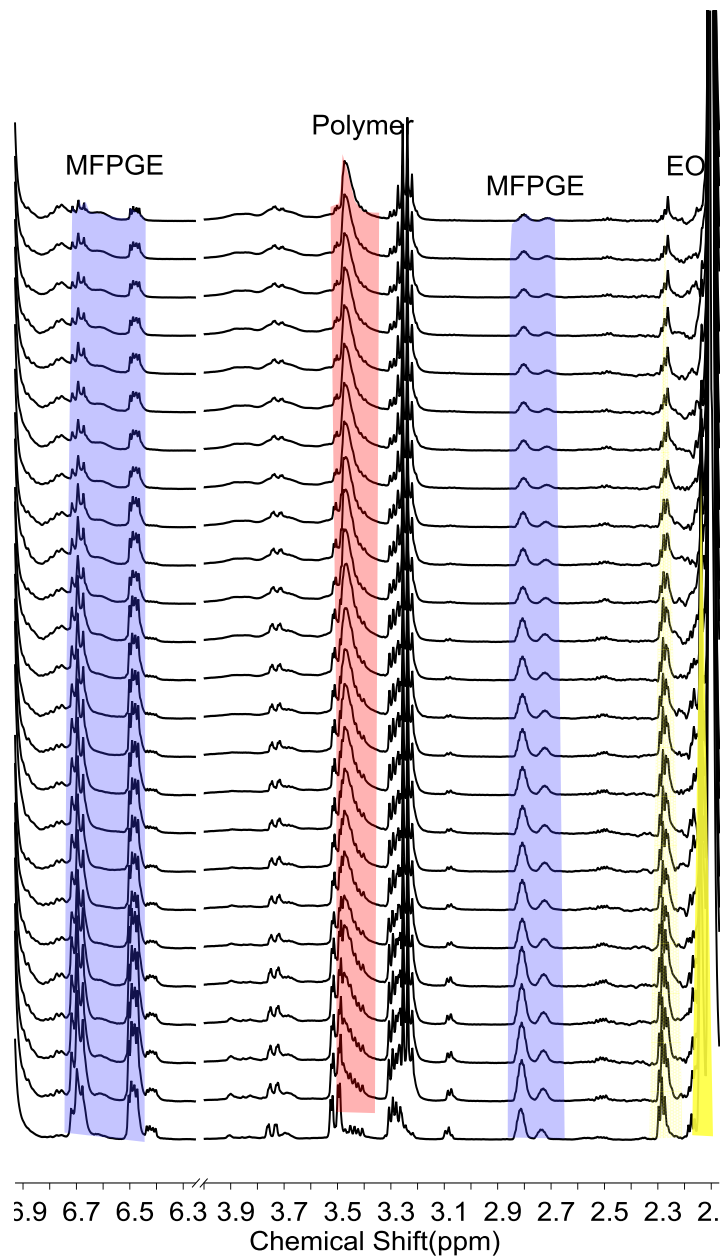

**Fig. S17.** <sup>1</sup>H-NMR spectra of kinetic experiment of MFPGE/EO copolymerization (MFPGE monomer was shaded in blue, EO monomer was shaded in yellow, the copolymer was shaded in red)

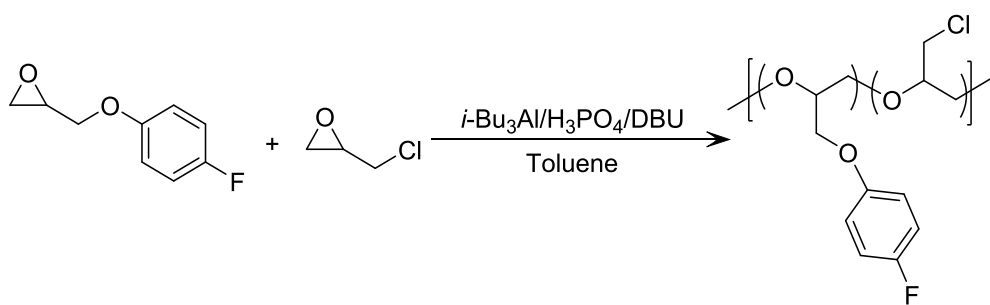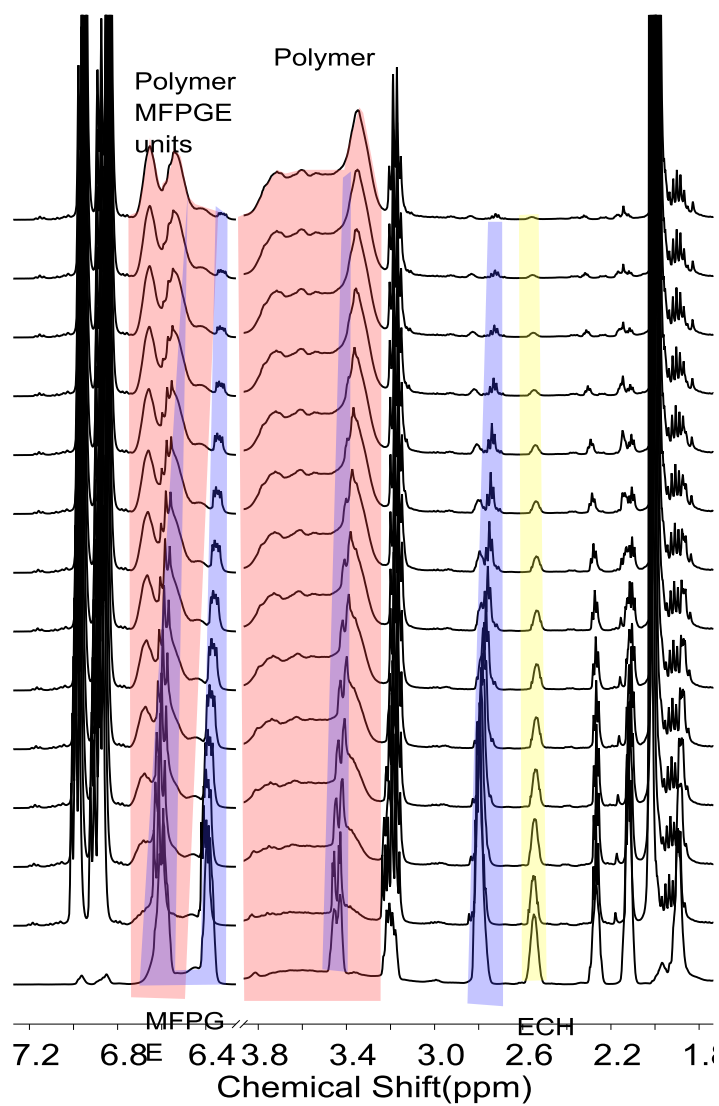

**Fig. S18.**  $^1\text{H-NMR}$  spectra of kinetic experiment of MFPGE/ECH copolymerization (MFPGE monomer was shaded in blue, ECH monomer was shaded in yellow, the copolymer was shaded in red)

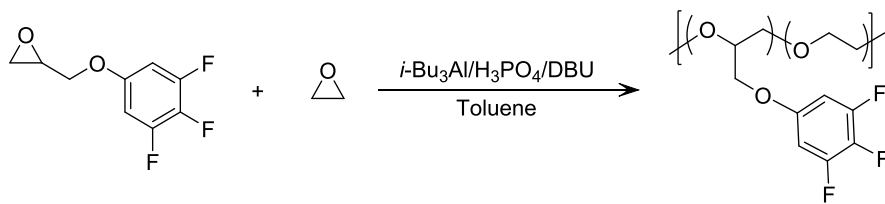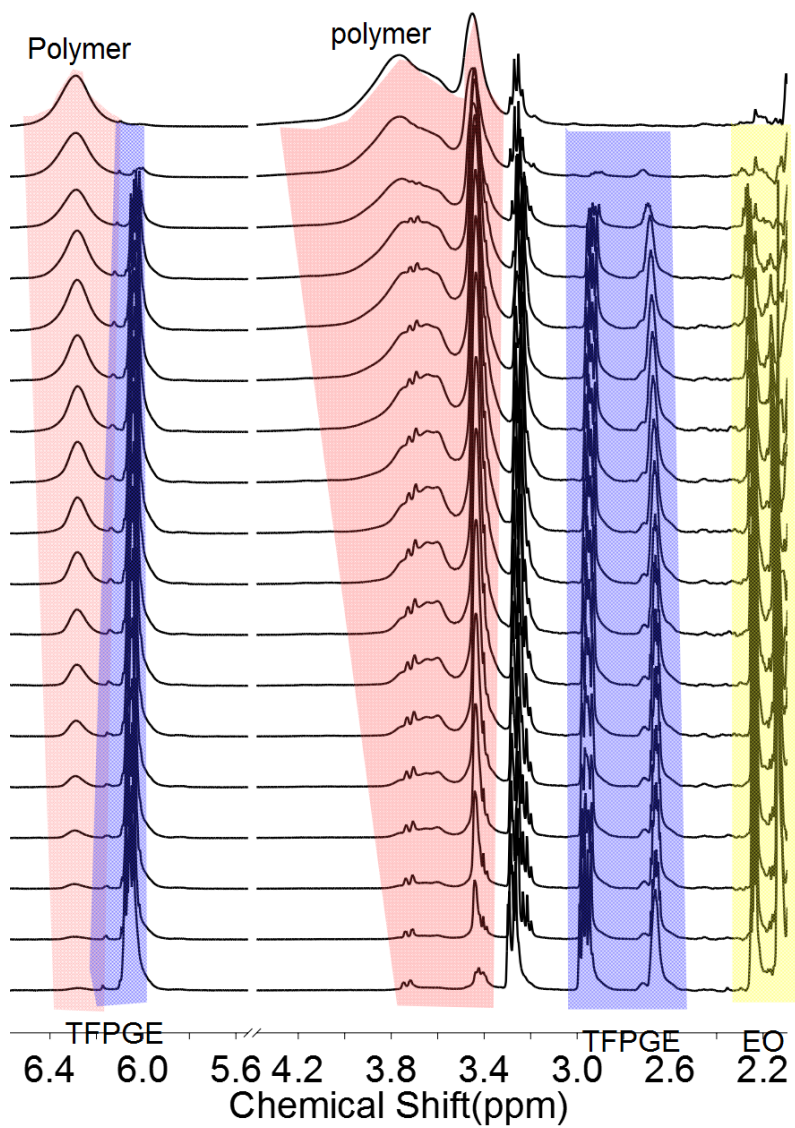

**Fig. S19.**  $^1\text{H-NMR}$  spectra of kinetic experiment of TFPGE/EO copolymerization (TFPGE monomer was shaded in blue, EO monomer was shaded in yellow, the copolymer was shaded in red)

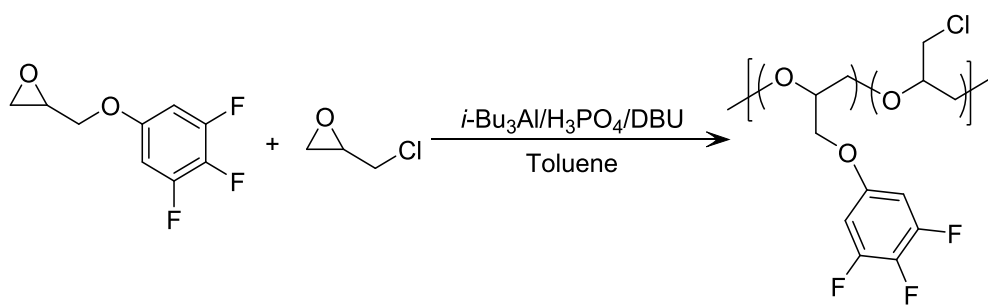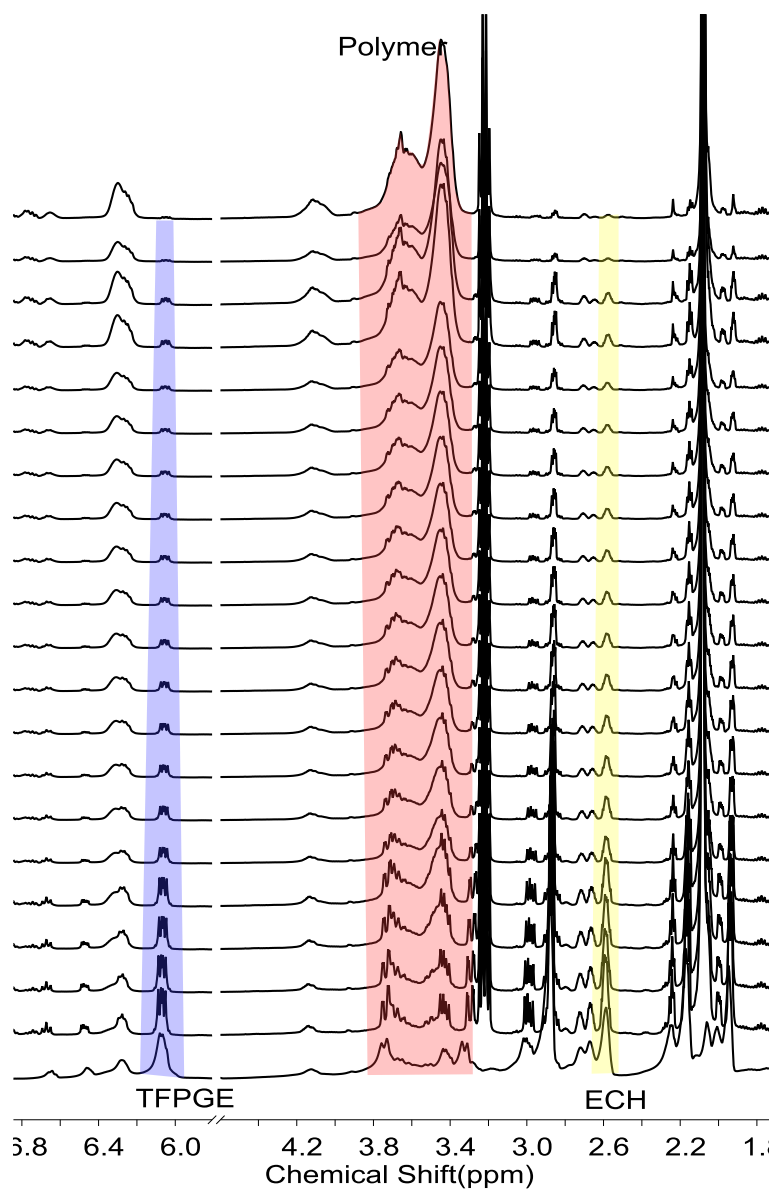

**Fig. S20.**  $^1\text{H-NMR}$  spectra of kinetic experiment of TFPGE/ECH copolymerization (TFPGE monomer was shaded in blue, ECH monomer was shaded in yellow, the copolymer was shaded in red)

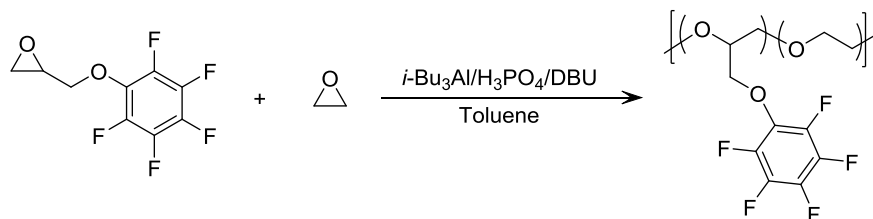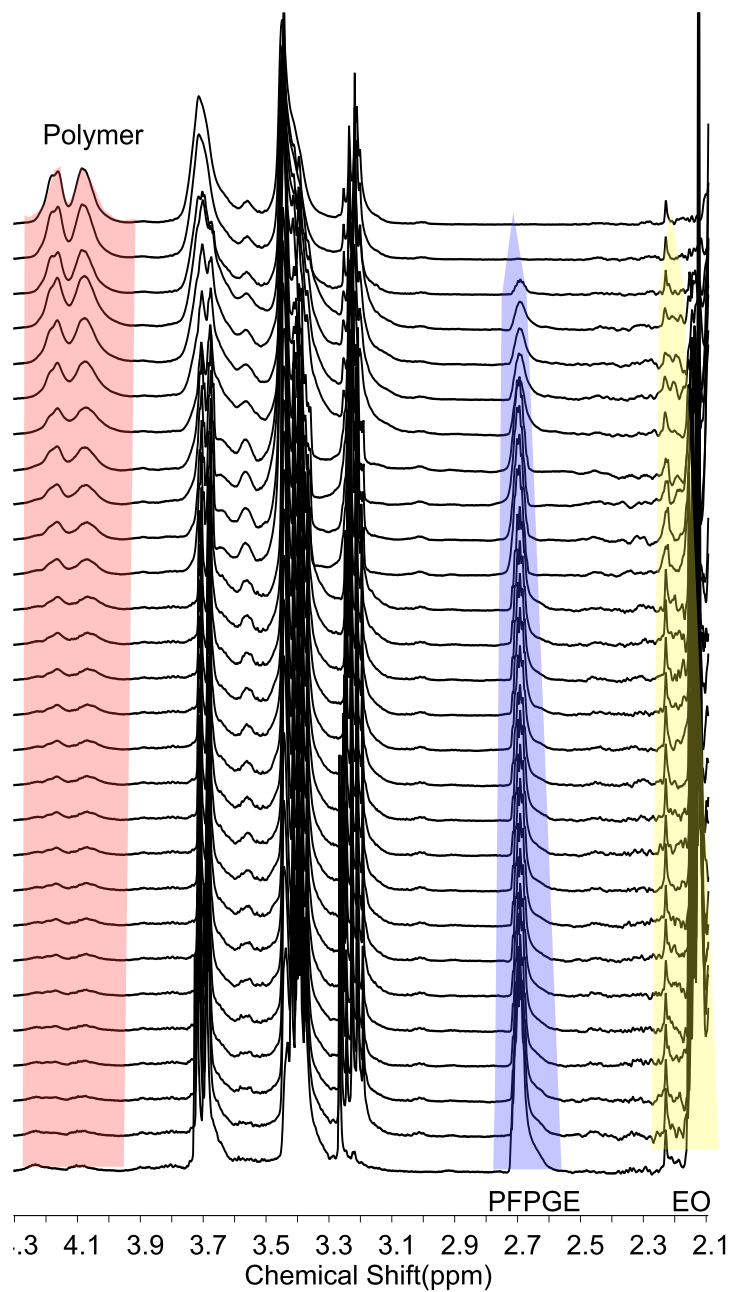

**Fig. S21.**  $^1\text{H-NMR}$  spectra of kinetic experiment of PFPGE/EO copolymerization (PFPGE monomer was shaded in blue, EO monomer was shaded in yellow, the copolymer was shaded in red)

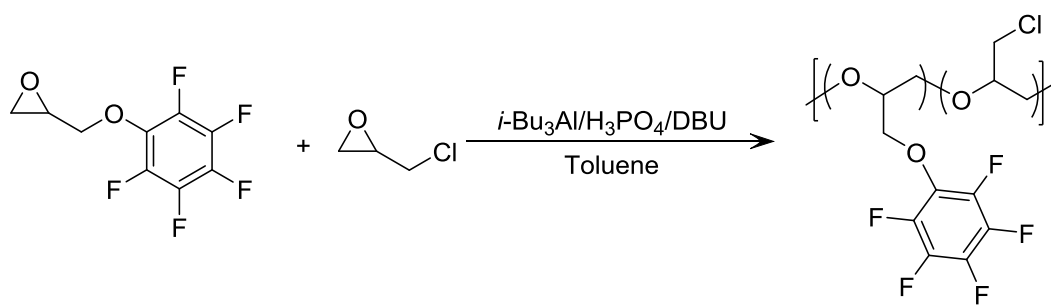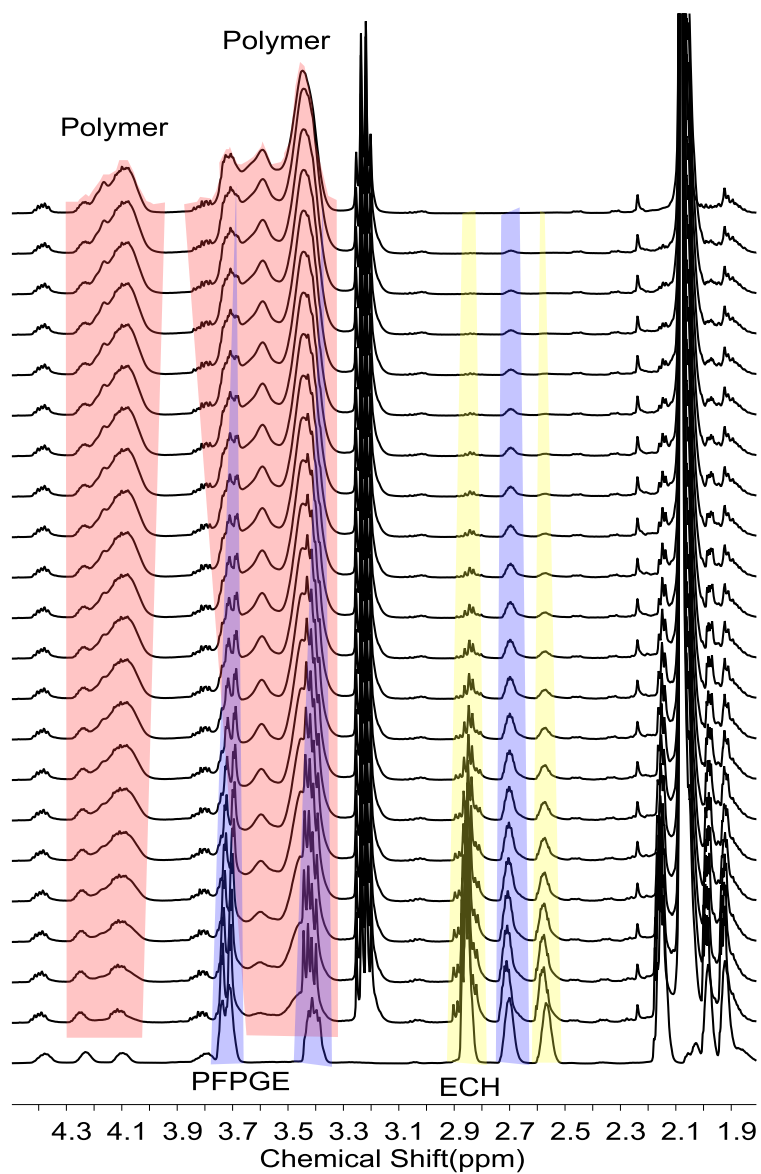

**Fig. S22.**  $^1\text{H}$ -NMR spectra of kinetic experiment of PFPGE/ECH copolymerization (PFPGE monomer was shaded in blue, ECH monomer was shaded in yellow, the copolymer was shaded in red)



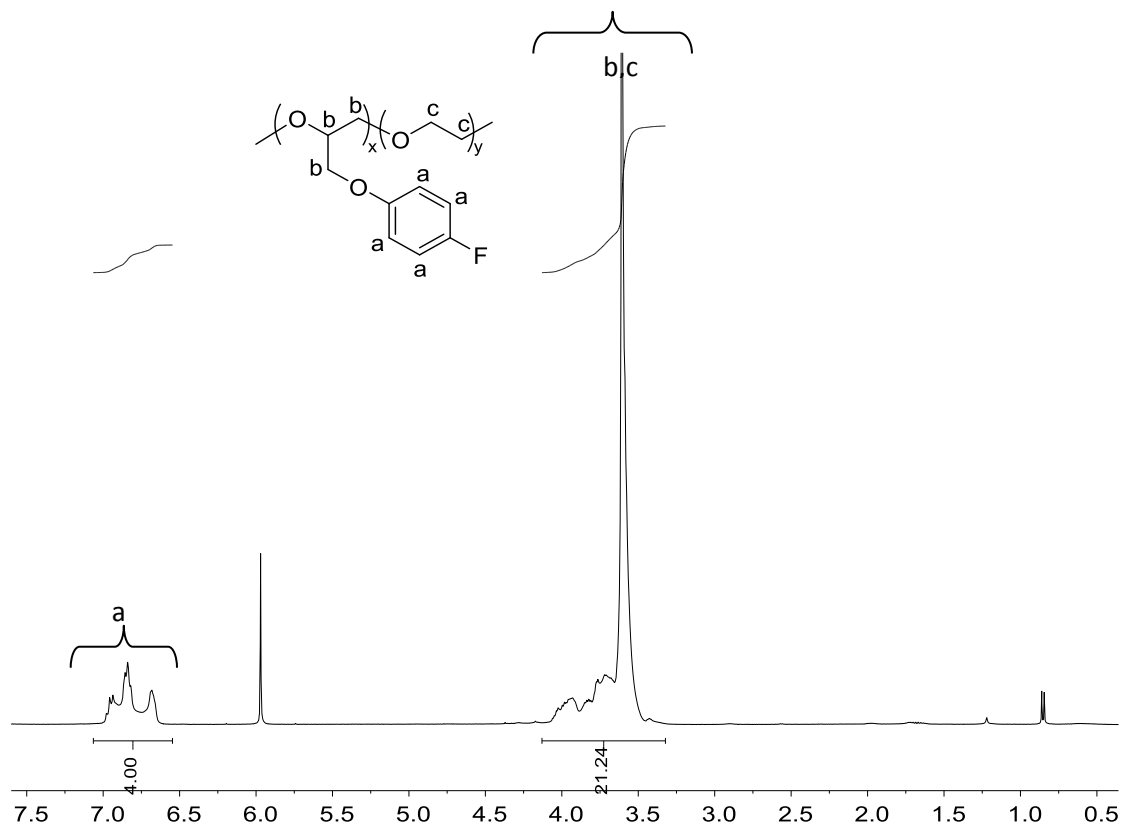

**Fig. S23.**  $^1\text{H-NMR}$  spectrum of a MFPGE-EO block copolymer with 20 mol% MFPGE (Table 2, Run 3)

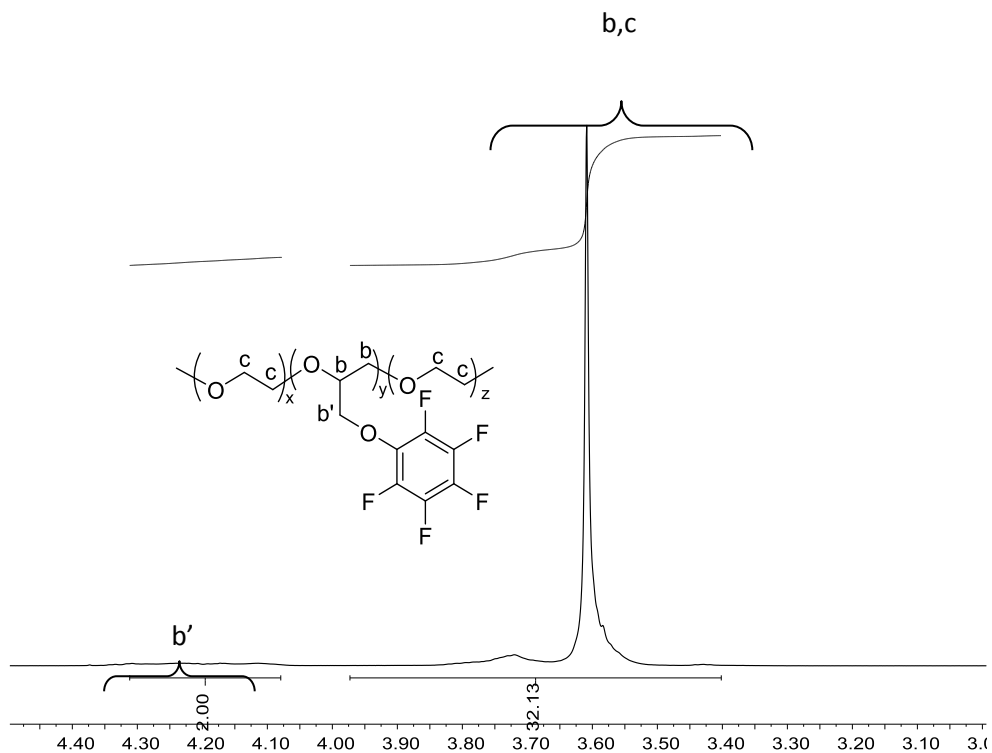

**Fig. S24.**  $^1\text{H-NMR}$  spectrum of a EO-PFPGE-EO block terpolymer with 12 mol% PFPGE (Table 2, Run 4)

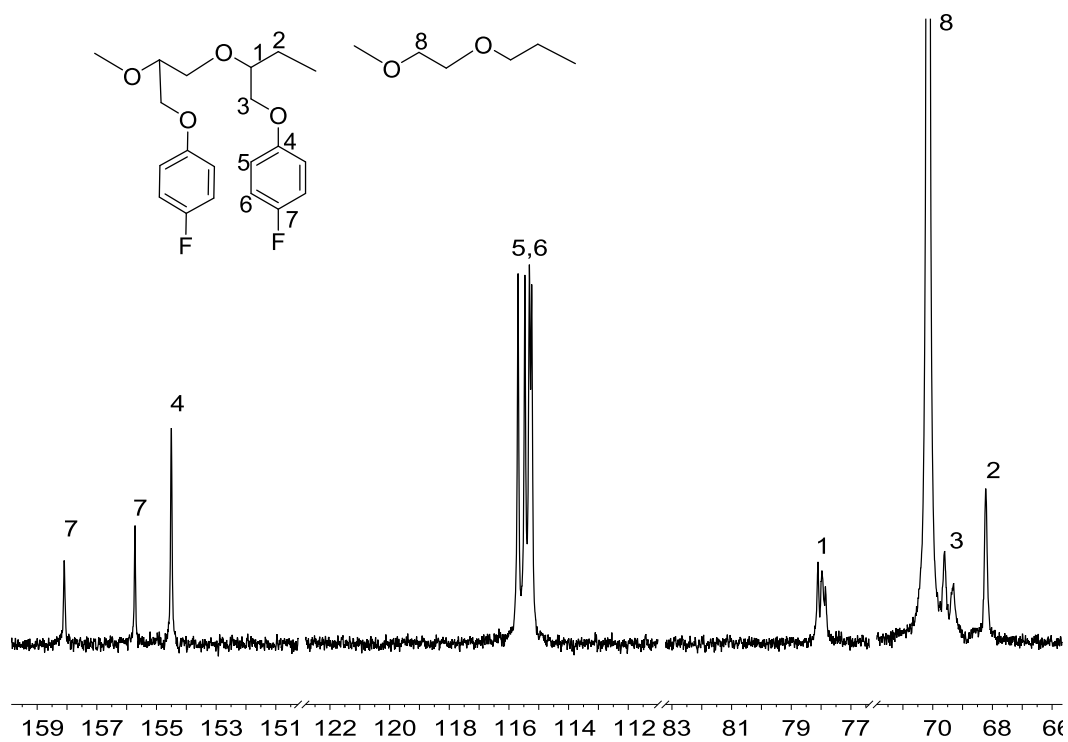

**Fig. S25.**  $^{13}\text{C}$ -NMR spectrum of a EO-MFPGE-EO block terpolymer with 11 mol% MFPGE (Table 2, Run 6)

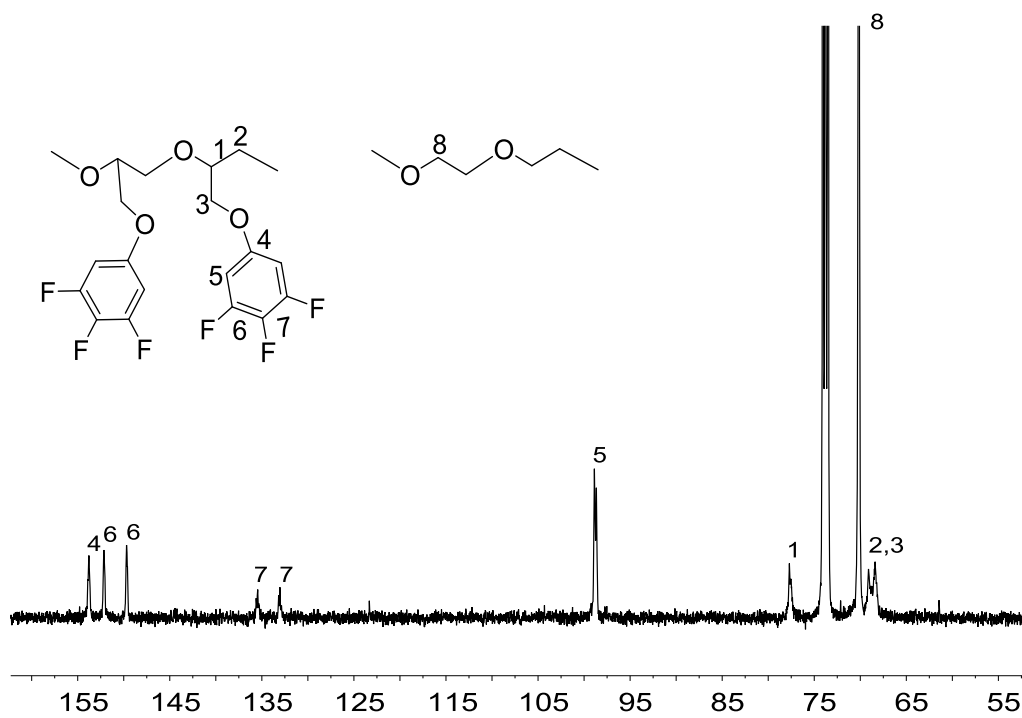

**Fig. S26.**  $^{13}\text{C}$ -NMR spectrum of a EO-TFPGE-EO block terpolymer with 11 mol% TFPGE (Table 2, Run 5)

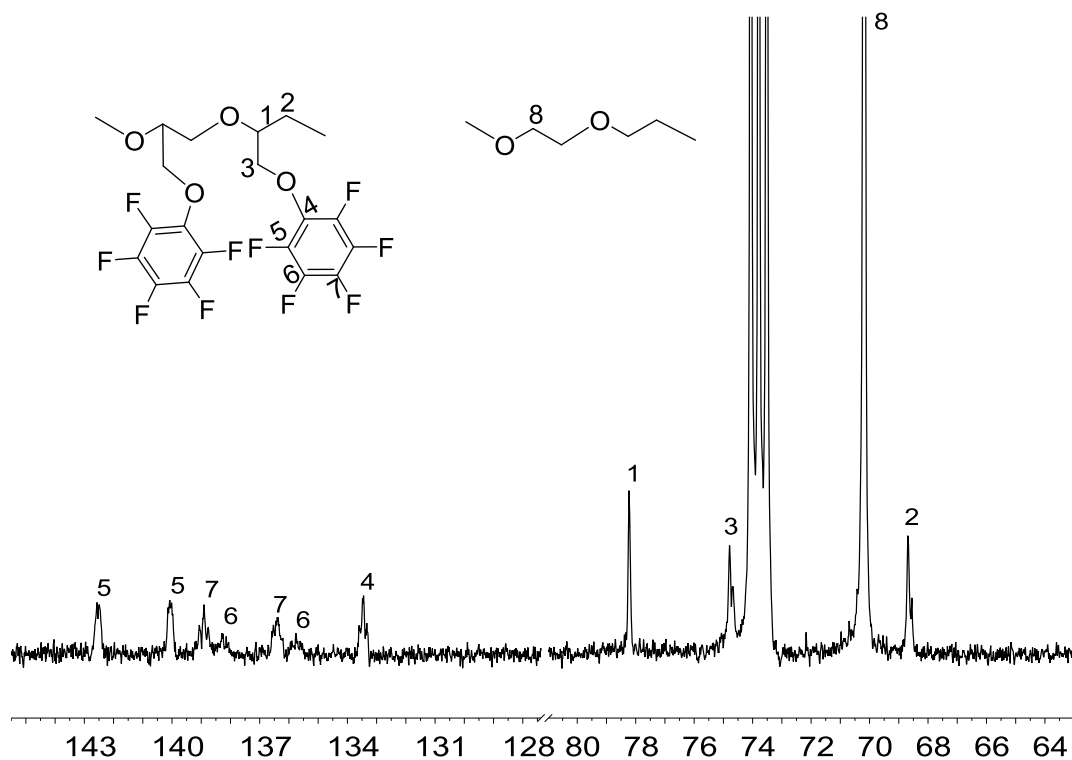

**Fig. S27.**  $^{13}\text{C}$ -NMR spectra of a EO-PFPGE-EO block terpolymer with 11 mol% PFPGE (Table 2, Run 4)

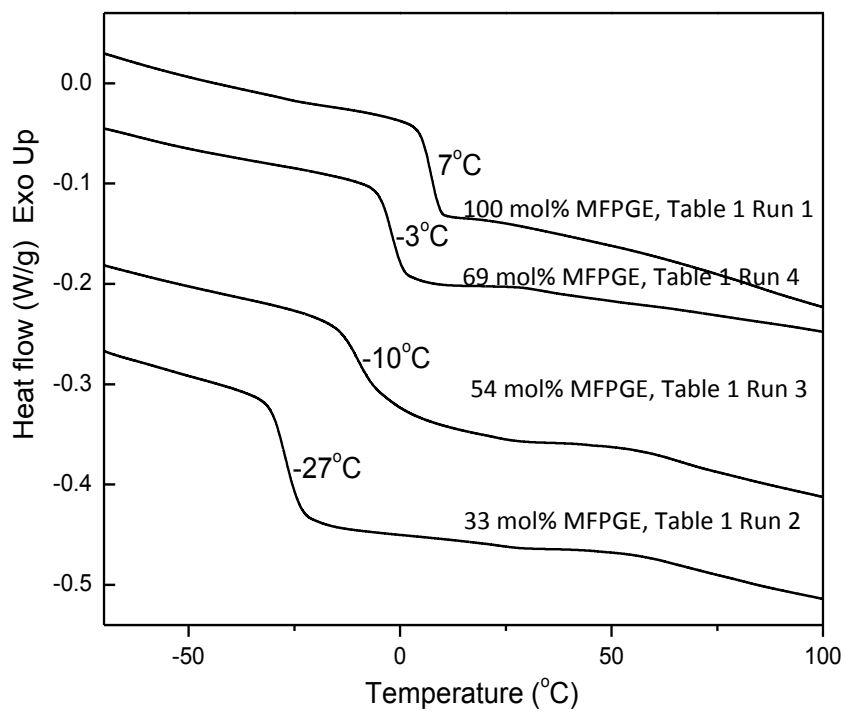

**Fig. S28.** DSC curves of MFPGE-EO statistical copolymers with different compositions

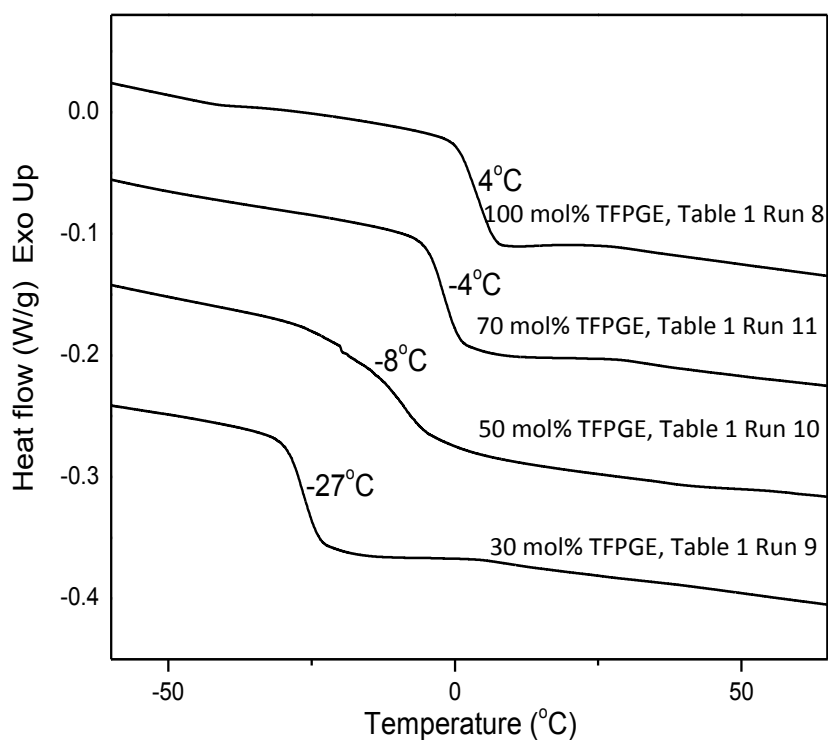

**Fig. S29.** DSC curves of TFPGE-EO statistical copolymers with different compositions

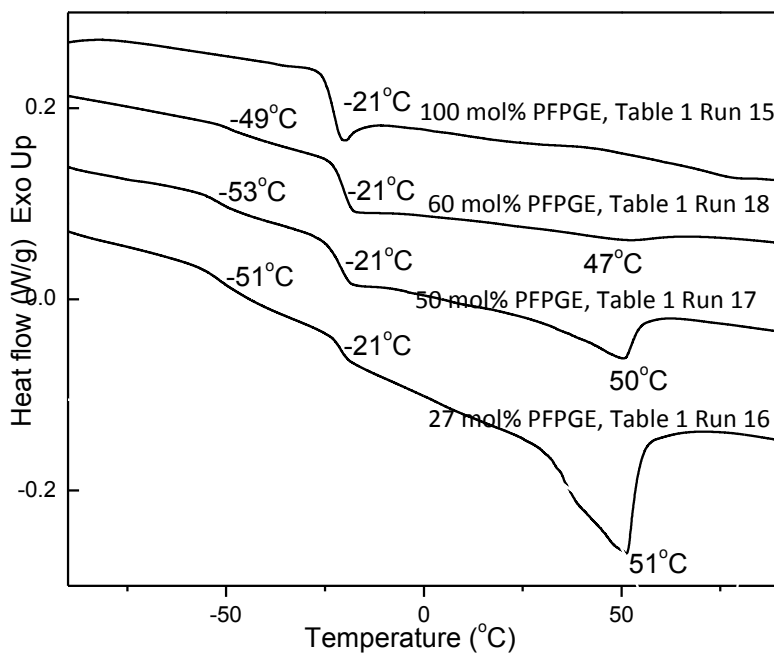

**Fig. S30.** DSC curves of PFPGE-EO statistical copolymers with different compositions

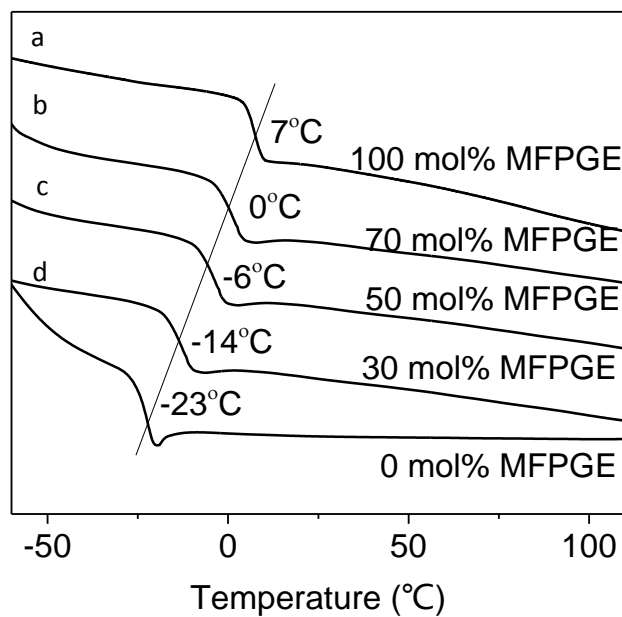

**Fig. S31.** DSC curves of MFPGE-ECH statistical copolymers with different compositions (a: Table 1, Run 1; b: Table 1, Run 7; c: Table 1, Run 6; d: Table 1, Run 5)

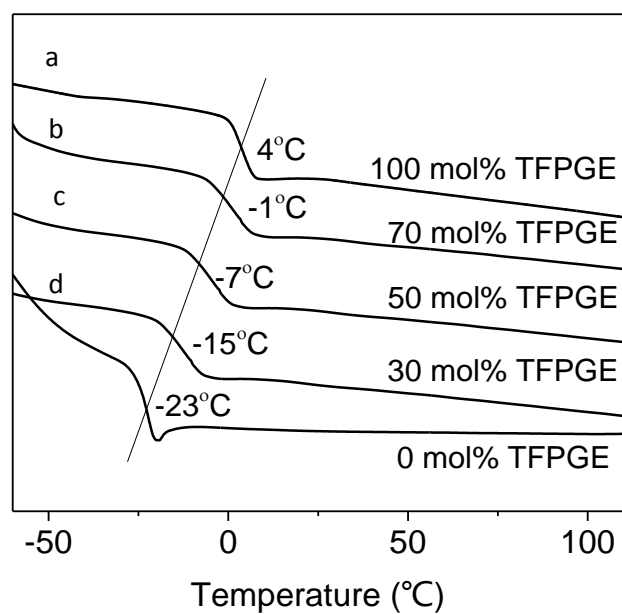

**Fig. S32.** DSC curves of TFPGE-ECH statistical copolymers with different compositions (a: Table 1, Run 8; b: Table 1, Run 14; c: Table 1, Run 13; d: Table 1, Run 12)

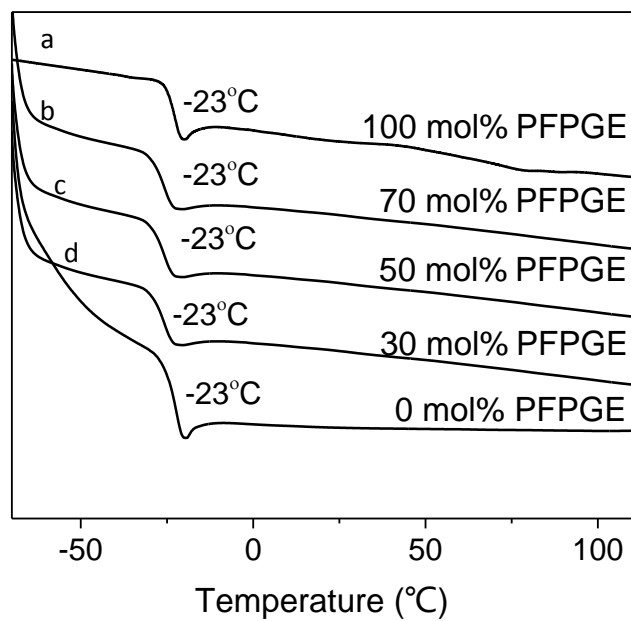

**Fig. S33.** DSC curves of PFPGE-ECH statistical copolymers with different compositions (a: Table 1, Run 15; b: Table 1, Run 21; c: Table 1, Run 20; d: Table 1, Run 19)

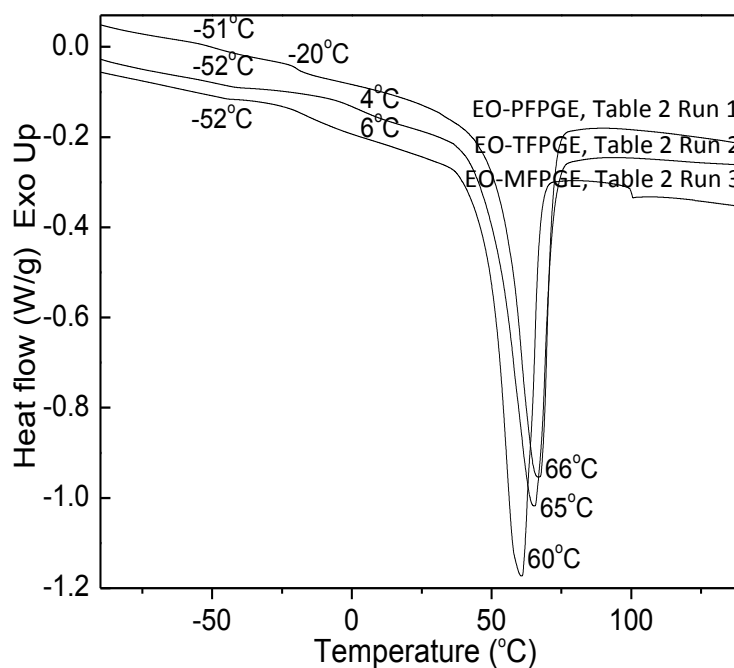

**Fig. S34.** DSC curves of MFPGE-EO, TFPGE-EO, and PFPGE-EO block copolymers

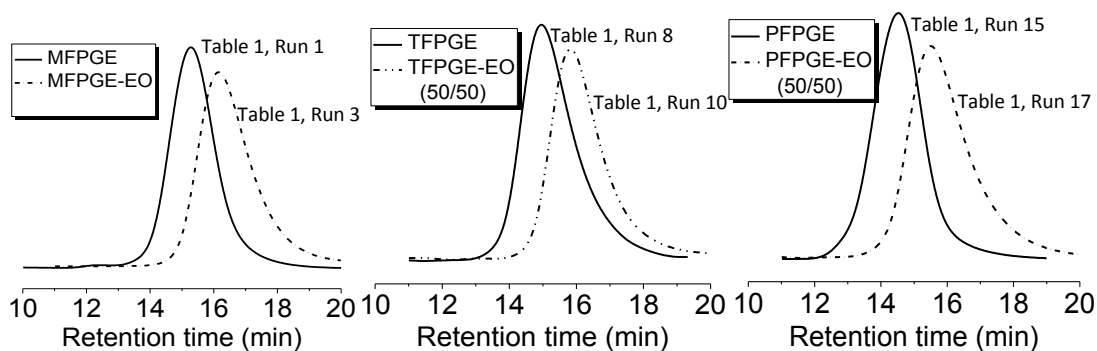

**Fig. S35.** GPC traces of MFPGE-EO, TFPGE-EO, TFPGE-EO statistical copolymers

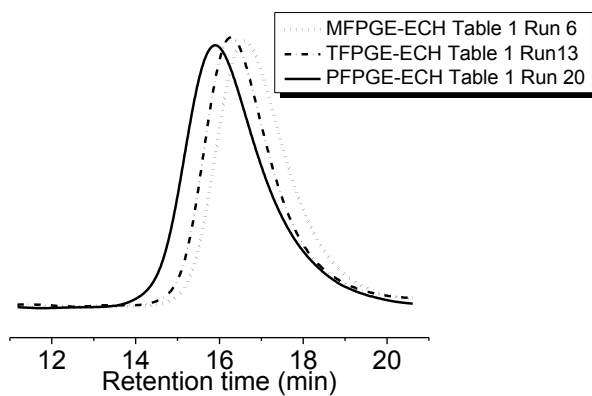

**Fig. S36.** GPC traces of MFPGE-ECH, TFPGE-ECH, TFPGE-ECH statistical copolymers

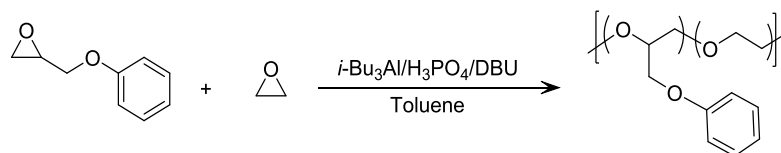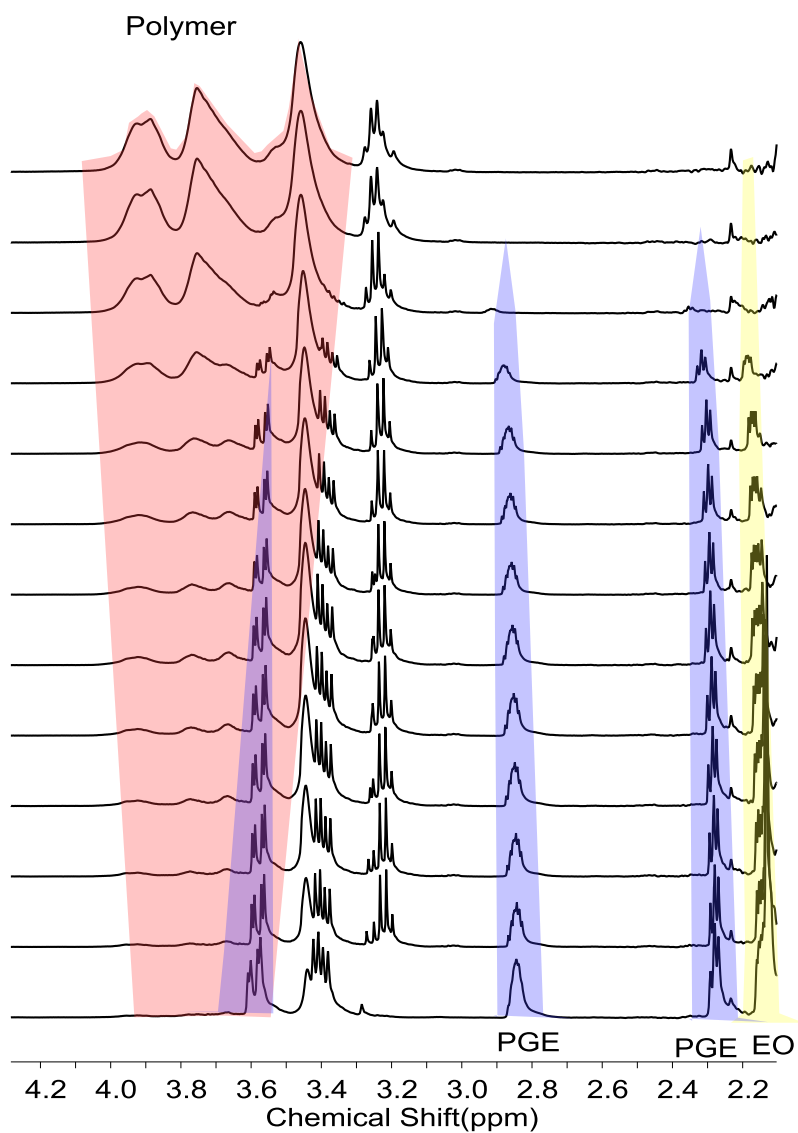

**Fig. S37.**  $^1\text{H}$ -NMR spectra of kinetic experiment of PGE/EO copolymerization (PGE monomer was shaded in blue, EO monomer was shaded in yellow, the copolymer was shaded in red)



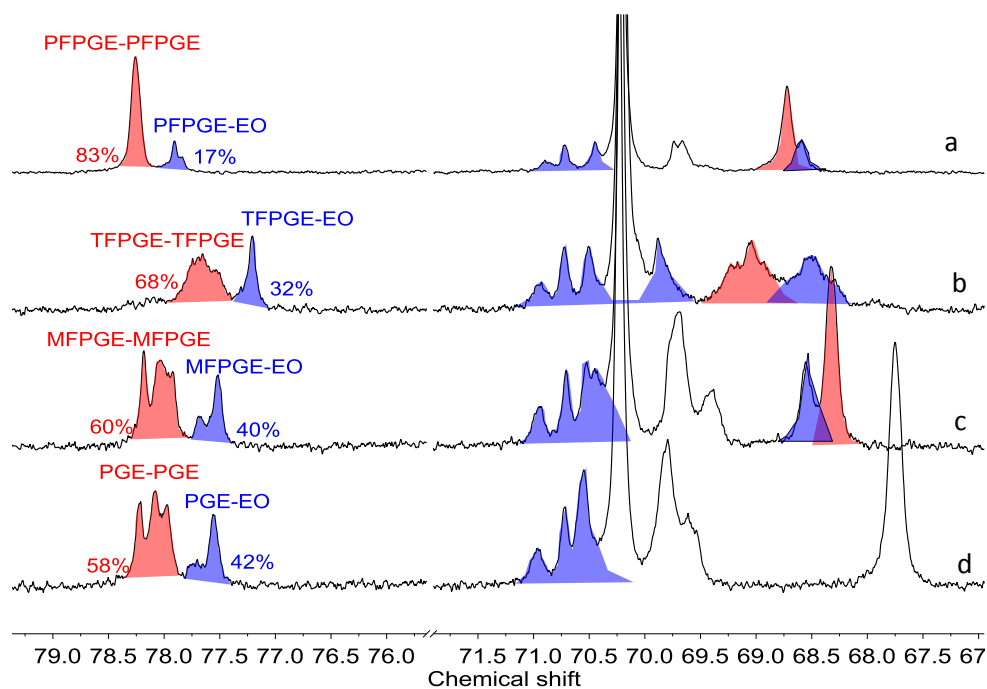

**Fig. S38.** Comparisons of  $^{13}\text{C}$ -NMR spectra of PFPGE-EO (a: Table 1, Run 17), TFPGE-EO (b: Table 1, Run 10), MFPGE-EO (c: Table 1, Run 3) and PGE-EO (d: Table S1, Run 2) copolymers with 50 mol% EO (joint signals in blue shadow, self-self signals in red shadow)

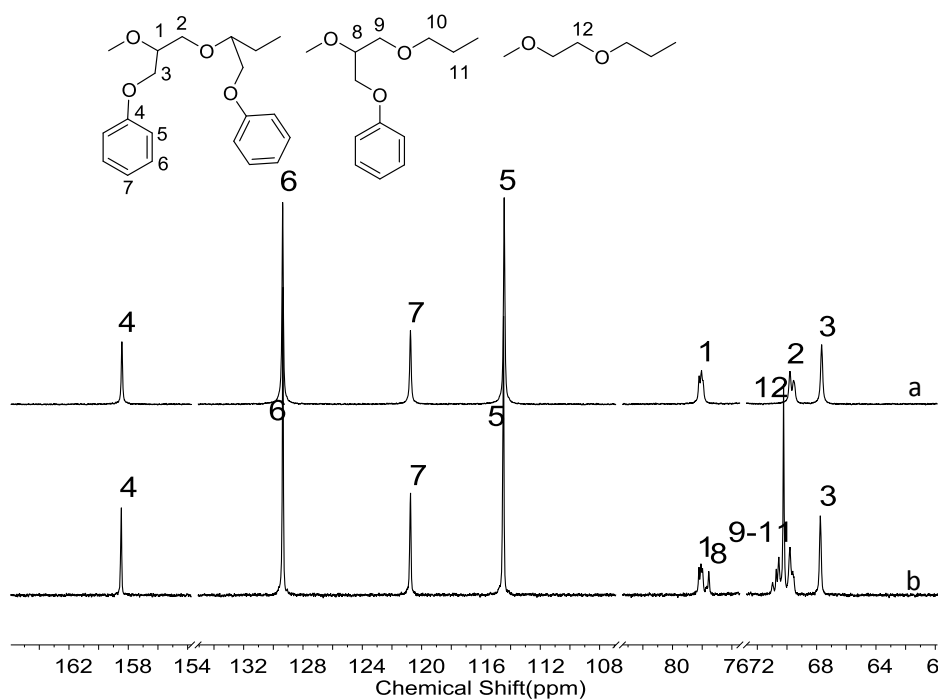

**Fig. S39.**  $^{13}\text{C}$ -NMR spectra of PGE homopolymer (a: Table S1, Run 1) and PGE-EO copolymer with 50 mol% MFPGE (b: Table S1, Run 2)

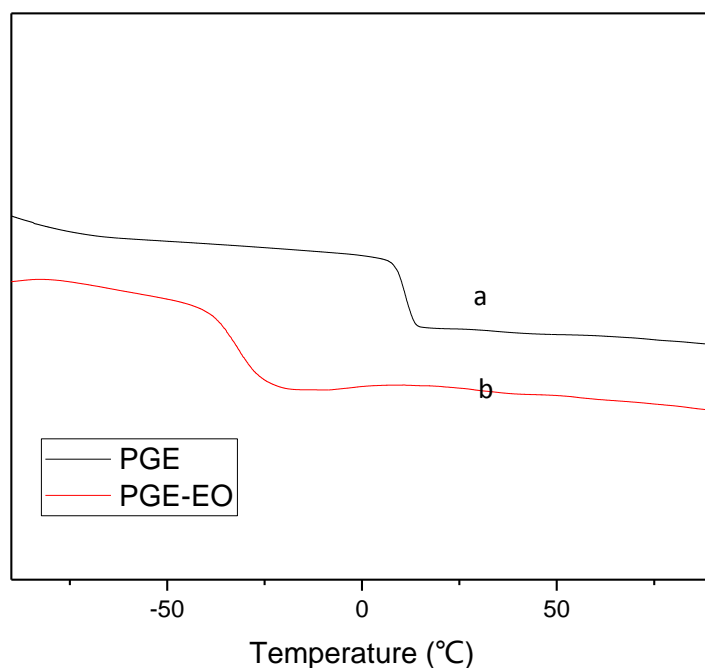

**Fig. S40.** DSC curves of PGE homopolymer (a: Table S1, Run 1) and PGE-EO copolymer with 50 mol% MFPGE (b: Table S1, Run 2).

**Table S1** Simultaneous copolymerization of phenyl glycidyl ether (PGE) with EO by *i*-Bu<sub>3</sub>Al/H<sub>3</sub>PO<sub>4</sub>/DBU<sup>a</sup>

| Run | PGE                                                                                 | comonomer                                                                           | $f_{\text{PGE}}^b$<br>mol% | Yield<br>(%) | $F_{\text{PGE}}^c$<br>mol% | $M_n^d$<br>( $\times 10^4$ ) | $M_w/M_n^d$ | $T_g^e$<br>(°C) |
|-----|-------------------------------------------------------------------------------------|-------------------------------------------------------------------------------------|----------------------------|--------------|----------------------------|------------------------------|-------------|-----------------|
| 1   | 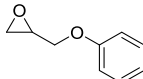 | -                                                                                   | 100                        | 100          | 100                        | 14.1                         | 1.42        | 11              |
| 2   |  |  | 50                         | 99           | 50                         | 9.1                          | 1.37        | -32             |

<sup>a</sup> Reaction condition: *i*-Bu<sub>3</sub>Al/H<sub>3</sub>PO<sub>4</sub>/DBU molar ratio, 1/0.33/0.25; *i*-Bu<sub>3</sub>Al, 0.25 mmol; monomer (2 mol/L in toluene)/*i*-Bu<sub>3</sub>Al=40; 25 °C; 30 min. <sup>b</sup> Initial mole fraction of PGE. <sup>c</sup> Final cumulative mole fraction composition of copolymer measured by <sup>1</sup>H-NMR spectroscopy. <sup>d</sup> Determined by GPC in 1,2,4-trichlorobenzene at 150 °C against polystyrene standard. <sup>e</sup> Determined by DSC.
